# Supplementary material for: Proteome-wide association study and functional validation identify novel protein markers for pancreatic ductal adenocarcinoma
Source: PubMed Central journal article supplement (PMC11010651; doi:10.1093/gigascience/giae012), 2024-04-12
Supplement: giae012_giga-d-23-00321_revision_1.pdf [file giae012_giga-d-23-00321_revision_1.pdf]

# GigaScience

## Proteome-wide association study and functional validation identify novel protein markers for pancreatic ductal adenocarcinoma --Manuscript Draft--

|                             |                                                                                                                               |                                              |
|-----------------------------|-------------------------------------------------------------------------------------------------------------------------------|----------------------------------------------|
| <b>Manuscript Number:</b>   | GIGA-D-23-00321R1                                                                                                             |                                              |
| <b>Full Title:</b>          | Proteome-wide association study and functional validation identify novel protein markers for pancreatic ductal adenocarcinoma |                                              |
| <b>Article Type:</b>        | Research                                                                                                                      |                                              |
| <b>Funding Information:</b> | University of Hawaii Cancer Center and V Foundation V Scholar Award                                                           | Not applicable                               |
|                             | National Cancer Institute (R01CA263494)                                                                                       | Dr. Chong Wu<br>Associated Professor Lang Wu |
|                             | National Human Genome Research Institute (U54HG013243)                                                                        | Associated Professor Lang Wu                 |
|                             | National Cancer Institute (R00CA218892)                                                                                       | Associated Professor Lang Wu                 |
|                             | National Institute on Minority Health and Health Disparities (U54MD007598)                                                    | Not applicable                               |
|                             | NIH/NCI (1U54CA14393)                                                                                                         | Not applicable                               |
|                             | NIH/NCI (U56 CA101599-01)                                                                                                     | Not applicable                               |
|                             | Department-of-Defense Breast Cancer Research Program (BC043180)                                                               | Dr. Jaydutt V. Vadgama                       |
|                             | NIH/NCATS (CTSI UL1TR000124)                                                                                                  | Dr. Jaydutt V. Vadgama                       |
|                             | Accelerating Excellence in Translational Science Pilot Grants (G0812D05)                                                      | Dr. Yong Wu                                  |
|                             | NIH/NCI (SC1CA200517)                                                                                                         | Dr. Yong Wu                                  |
|                             | NIH/NCI (9 SC1 GM135050-05)                                                                                                   | Dr. Yong Wu                                  |
|                             | VA Merit Award (1 I01 CX001822-01A2)                                                                                          | Dr. Qizhi Yao                                |
|                             | National Cancer Institute (NCI), US National Institutes of Health (NIH) (HHSN261200800001E)                                   | Not applicable                               |
|                             | NIH/NCI (K07 CA140790)                                                                                                        | Not applicable                               |
|                             | the American Society of Clinical Oncology Conquer Cancer Foundation                                                           | Not applicable                               |
|                             | the Howard Hughes Medical Institute                                                                                           | Not applicable                               |
|                             | the Lustgarten Foundation                                                                                                     | Not applicable                               |
|                             | he Robert T. and Judith B. Hale Fund for Pancreatic Cancer Research                                                           | Not applicable                               |
|                             | Promises for Purple                                                                                                           | Not applicable                               |
|                             | NCI (R01CA154823)                                                                                                             | Not applicable                               |
|                             | National Institutes of Health to The Johns Hopkins University (HHSN2682011000111)                                             | Not applicable                               |
|                             | National Institute for Health Research (NIHR)                                                                                 | Not applicable                               |
|                             | NIHR BioResource                                                                                                              | Not applicable                               |

|                                                      |                                                                                                                                                                                                                                                                                                                                                                                                                                                                                                                                                                                                                                                                                                                                                                                                                                                                                                                                                                                                                                                                                                                                                                                                                                                                                                                                                                                                                                                                                                                                                                                                                                                                                                                                                    |                |
|------------------------------------------------------|----------------------------------------------------------------------------------------------------------------------------------------------------------------------------------------------------------------------------------------------------------------------------------------------------------------------------------------------------------------------------------------------------------------------------------------------------------------------------------------------------------------------------------------------------------------------------------------------------------------------------------------------------------------------------------------------------------------------------------------------------------------------------------------------------------------------------------------------------------------------------------------------------------------------------------------------------------------------------------------------------------------------------------------------------------------------------------------------------------------------------------------------------------------------------------------------------------------------------------------------------------------------------------------------------------------------------------------------------------------------------------------------------------------------------------------------------------------------------------------------------------------------------------------------------------------------------------------------------------------------------------------------------------------------------------------------------------------------------------------------------|----------------|
|                                                      | NIHR Cambridge Biomedical Research Centre (BRC-1215-20014)                                                                                                                                                                                                                                                                                                                                                                                                                                                                                                                                                                                                                                                                                                                                                                                                                                                                                                                                                                                                                                                                                                                                                                                                                                                                                                                                                                                                                                                                                                                                                                                                                                                                                         | Not applicable |
|                                                      | NIHR Blood and Transplant Research Unit in Donor Health and Genomics (NIHR BTRU-2014-10024)                                                                                                                                                                                                                                                                                                                                                                                                                                                                                                                                                                                                                                                                                                                                                                                                                                                                                                                                                                                                                                                                                                                                                                                                                                                                                                                                                                                                                                                                                                                                                                                                                                                        | Not applicable |
|                                                      | UK Medical Research Council (MR/L003120/1)                                                                                                                                                                                                                                                                                                                                                                                                                                                                                                                                                                                                                                                                                                                                                                                                                                                                                                                                                                                                                                                                                                                                                                                                                                                                                                                                                                                                                                                                                                                                                                                                                                                                                                         | Not applicable |
|                                                      | British Heart Foundation (SP/09/002; RG/13/13/30194; RG/18/13/33946)                                                                                                                                                                                                                                                                                                                                                                                                                                                                                                                                                                                                                                                                                                                                                                                                                                                                                                                                                                                                                                                                                                                                                                                                                                                                                                                                                                                                                                                                                                                                                                                                                                                                               | Not applicable |
|                                                      | NIHR Cambridge BRC (BRC-1215-20014)                                                                                                                                                                                                                                                                                                                                                                                                                                                                                                                                                                                                                                                                                                                                                                                                                                                                                                                                                                                                                                                                                                                                                                                                                                                                                                                                                                                                                                                                                                                                                                                                                                                                                                                | Not applicable |
| <b>Abstract:</b>                                     | <p><b>Abstract</b><br/> Pancreatic ductal adenocarcinoma (PDAC) remains a lethal malignancy, largely due to the paucity of reliable biomarkers for early detection and therapeutic targeting. Existing blood protein biomarkers for PDAC often suffer from replicability issues, arising from inherent limitations such as unmeasured confounding factors in conventional epidemiologic study designs. To circumvent these limitations, we use genetic instruments to identify proteins with genetically predicted levels to be associated with PDAC risk. Leveraging genome and plasma proteome data from the INTERVAL study, we established and validated models to predict protein levels using genetic variants. By examining 8,275 PDAC cases and 6,723 controls, we identified 40 associated proteins, of which 16 are novel. Functionally validating these candidates by focusing on two selected novel protein-encoding genes, GOLMA1 and B4GALT1, we demonstrated their pivotal roles in driving PDAC cell proliferation, migration, and invasion. Furthermore, we also identified potential drug repurposing opportunities for treating PDAC.</p> <p><b>Significance:</b><br/> PDAC is a notoriously difficult-to-treat malignancy, and our limited understanding of causal protein markers hampers progress in developing effective early detection strategies and treatments. Our study identifies novel causal proteins using genetic instruments and subsequently functionally validates selected novel proteins. This dual approach enhances our understanding of PDAC etiology and potentially opens new avenues for therapeutic interventions.</p> <p><b>Keywords:</b> Biomarkers, protein, genetics, pancreatic cancer, risk</p> |                |
| <b>Corresponding Author:</b>                         | Lang Wu<br>University of Hawai'i at Manoa<br>Honolulu, UNITED STATES                                                                                                                                                                                                                                                                                                                                                                                                                                                                                                                                                                                                                                                                                                                                                                                                                                                                                                                                                                                                                                                                                                                                                                                                                                                                                                                                                                                                                                                                                                                                                                                                                                                                               |                |
| <b>Corresponding Author Secondary Information:</b>   |                                                                                                                                                                                                                                                                                                                                                                                                                                                                                                                                                                                                                                                                                                                                                                                                                                                                                                                                                                                                                                                                                                                                                                                                                                                                                                                                                                                                                                                                                                                                                                                                                                                                                                                                                    |                |
| <b>Corresponding Author's Institution:</b>           | University of Hawai'i at Manoa                                                                                                                                                                                                                                                                                                                                                                                                                                                                                                                                                                                                                                                                                                                                                                                                                                                                                                                                                                                                                                                                                                                                                                                                                                                                                                                                                                                                                                                                                                                                                                                                                                                                                                                     |                |
| <b>Corresponding Author's Secondary Institution:</b> |                                                                                                                                                                                                                                                                                                                                                                                                                                                                                                                                                                                                                                                                                                                                                                                                                                                                                                                                                                                                                                                                                                                                                                                                                                                                                                                                                                                                                                                                                                                                                                                                                                                                                                                                                    |                |
| <b>First Author:</b>                                 | Jingjing Zhu                                                                                                                                                                                                                                                                                                                                                                                                                                                                                                                                                                                                                                                                                                                                                                                                                                                                                                                                                                                                                                                                                                                                                                                                                                                                                                                                                                                                                                                                                                                                                                                                                                                                                                                                       |                |
| <b>First Author Secondary Information:</b>           |                                                                                                                                                                                                                                                                                                                                                                                                                                                                                                                                                                                                                                                                                                                                                                                                                                                                                                                                                                                                                                                                                                                                                                                                                                                                                                                                                                                                                                                                                                                                                                                                                                                                                                                                                    |                |
| <b>Order of Authors:</b>                             | Jingjing Zhu                                                                                                                                                                                                                                                                                                                                                                                                                                                                                                                                                                                                                                                                                                                                                                                                                                                                                                                                                                                                                                                                                                                                                                                                                                                                                                                                                                                                                                                                                                                                                                                                                                                                                                                                       |                |
|                                                      | Ke Wu                                                                                                                                                                                                                                                                                                                                                                                                                                                                                                                                                                                                                                                                                                                                                                                                                                                                                                                                                                                                                                                                                                                                                                                                                                                                                                                                                                                                                                                                                                                                                                                                                                                                                                                                              |                |
|                                                      | Shuai Liu                                                                                                                                                                                                                                                                                                                                                                                                                                                                                                                                                                                                                                                                                                                                                                                                                                                                                                                                                                                                                                                                                                                                                                                                                                                                                                                                                                                                                                                                                                                                                                                                                                                                                                                                          |                |
|                                                      | Alexandra Masca                                                                                                                                                                                                                                                                                                                                                                                                                                                                                                                                                                                                                                                                                                                                                                                                                                                                                                                                                                                                                                                                                                                                                                                                                                                                                                                                                                                                                                                                                                                                                                                                                                                                                                                                    |                |
|                                                      | Hua Zhong                                                                                                                                                                                                                                                                                                                                                                                                                                                                                                                                                                                                                                                                                                                                                                                                                                                                                                                                                                                                                                                                                                                                                                                                                                                                                                                                                                                                                                                                                                                                                                                                                                                                                                                                          |                |
|                                                      | Tai Yang                                                                                                                                                                                                                                                                                                                                                                                                                                                                                                                                                                                                                                                                                                                                                                                                                                                                                                                                                                                                                                                                                                                                                                                                                                                                                                                                                                                                                                                                                                                                                                                                                                                                                                                                           |                |
|                                                      | Dalia H Ghoneim                                                                                                                                                                                                                                                                                                                                                                                                                                                                                                                                                                                                                                                                                                                                                                                                                                                                                                                                                                                                                                                                                                                                                                                                                                                                                                                                                                                                                                                                                                                                                                                                                                                                                                                                    |                |
|                                                      | Praveen Surendran                                                                                                                                                                                                                                                                                                                                                                                                                                                                                                                                                                                                                                                                                                                                                                                                                                                                                                                                                                                                                                                                                                                                                                                                                                                                                                                                                                                                                                                                                                                                                                                                                                                                                                                                  |                |
|                                                      | Tanxin Liu                                                                                                                                                                                                                                                                                                                                                                                                                                                                                                                                                                                                                                                                                                                                                                                                                                                                                                                                                                                                                                                                                                                                                                                                                                                                                                                                                                                                                                                                                                                                                                                                                                                                                                                                         |                |

|                                                |                                                                                                                                                                                                                                                                                                                                                                                                                                                                                                                                                                                                                                                                                                                                                                                                                                                                                                                                                                                                                                                                                                                                                                                                                                                                                                                                                                                                                                                                                                                                                                                                                                                                                                                                                                                                                                                                                                                                                                                                                                                                                                                                                                                                                                                                                                                                                                                                                                                                                                                                                                                                                                                                                                                                                                      |
|------------------------------------------------|----------------------------------------------------------------------------------------------------------------------------------------------------------------------------------------------------------------------------------------------------------------------------------------------------------------------------------------------------------------------------------------------------------------------------------------------------------------------------------------------------------------------------------------------------------------------------------------------------------------------------------------------------------------------------------------------------------------------------------------------------------------------------------------------------------------------------------------------------------------------------------------------------------------------------------------------------------------------------------------------------------------------------------------------------------------------------------------------------------------------------------------------------------------------------------------------------------------------------------------------------------------------------------------------------------------------------------------------------------------------------------------------------------------------------------------------------------------------------------------------------------------------------------------------------------------------------------------------------------------------------------------------------------------------------------------------------------------------------------------------------------------------------------------------------------------------------------------------------------------------------------------------------------------------------------------------------------------------------------------------------------------------------------------------------------------------------------------------------------------------------------------------------------------------------------------------------------------------------------------------------------------------------------------------------------------------------------------------------------------------------------------------------------------------------------------------------------------------------------------------------------------------------------------------------------------------------------------------------------------------------------------------------------------------------------------------------------------------------------------------------------------------|
|                                                | Qizhi Yao                                                                                                                                                                                                                                                                                                                                                                                                                                                                                                                                                                                                                                                                                                                                                                                                                                                                                                                                                                                                                                                                                                                                                                                                                                                                                                                                                                                                                                                                                                                                                                                                                                                                                                                                                                                                                                                                                                                                                                                                                                                                                                                                                                                                                                                                                                                                                                                                                                                                                                                                                                                                                                                                                                                                                            |
|                                                | Tao Liu                                                                                                                                                                                                                                                                                                                                                                                                                                                                                                                                                                                                                                                                                                                                                                                                                                                                                                                                                                                                                                                                                                                                                                                                                                                                                                                                                                                                                                                                                                                                                                                                                                                                                                                                                                                                                                                                                                                                                                                                                                                                                                                                                                                                                                                                                                                                                                                                                                                                                                                                                                                                                                                                                                                                                              |
|                                                | Sarah Fahle                                                                                                                                                                                                                                                                                                                                                                                                                                                                                                                                                                                                                                                                                                                                                                                                                                                                                                                                                                                                                                                                                                                                                                                                                                                                                                                                                                                                                                                                                                                                                                                                                                                                                                                                                                                                                                                                                                                                                                                                                                                                                                                                                                                                                                                                                                                                                                                                                                                                                                                                                                                                                                                                                                                                                          |
|                                                | Adam Butterworth                                                                                                                                                                                                                                                                                                                                                                                                                                                                                                                                                                                                                                                                                                                                                                                                                                                                                                                                                                                                                                                                                                                                                                                                                                                                                                                                                                                                                                                                                                                                                                                                                                                                                                                                                                                                                                                                                                                                                                                                                                                                                                                                                                                                                                                                                                                                                                                                                                                                                                                                                                                                                                                                                                                                                     |
|                                                | Md Ashad Alam                                                                                                                                                                                                                                                                                                                                                                                                                                                                                                                                                                                                                                                                                                                                                                                                                                                                                                                                                                                                                                                                                                                                                                                                                                                                                                                                                                                                                                                                                                                                                                                                                                                                                                                                                                                                                                                                                                                                                                                                                                                                                                                                                                                                                                                                                                                                                                                                                                                                                                                                                                                                                                                                                                                                                        |
|                                                | Jaydutt V. Vadgama                                                                                                                                                                                                                                                                                                                                                                                                                                                                                                                                                                                                                                                                                                                                                                                                                                                                                                                                                                                                                                                                                                                                                                                                                                                                                                                                                                                                                                                                                                                                                                                                                                                                                                                                                                                                                                                                                                                                                                                                                                                                                                                                                                                                                                                                                                                                                                                                                                                                                                                                                                                                                                                                                                                                                   |
|                                                | Youping Deng                                                                                                                                                                                                                                                                                                                                                                                                                                                                                                                                                                                                                                                                                                                                                                                                                                                                                                                                                                                                                                                                                                                                                                                                                                                                                                                                                                                                                                                                                                                                                                                                                                                                                                                                                                                                                                                                                                                                                                                                                                                                                                                                                                                                                                                                                                                                                                                                                                                                                                                                                                                                                                                                                                                                                         |
|                                                | Hong-Wen Deng                                                                                                                                                                                                                                                                                                                                                                                                                                                                                                                                                                                                                                                                                                                                                                                                                                                                                                                                                                                                                                                                                                                                                                                                                                                                                                                                                                                                                                                                                                                                                                                                                                                                                                                                                                                                                                                                                                                                                                                                                                                                                                                                                                                                                                                                                                                                                                                                                                                                                                                                                                                                                                                                                                                                                        |
|                                                | Chong Wu                                                                                                                                                                                                                                                                                                                                                                                                                                                                                                                                                                                                                                                                                                                                                                                                                                                                                                                                                                                                                                                                                                                                                                                                                                                                                                                                                                                                                                                                                                                                                                                                                                                                                                                                                                                                                                                                                                                                                                                                                                                                                                                                                                                                                                                                                                                                                                                                                                                                                                                                                                                                                                                                                                                                                             |
|                                                | Yong Wu                                                                                                                                                                                                                                                                                                                                                                                                                                                                                                                                                                                                                                                                                                                                                                                                                                                                                                                                                                                                                                                                                                                                                                                                                                                                                                                                                                                                                                                                                                                                                                                                                                                                                                                                                                                                                                                                                                                                                                                                                                                                                                                                                                                                                                                                                                                                                                                                                                                                                                                                                                                                                                                                                                                                                              |
|                                                | Lang Wu                                                                                                                                                                                                                                                                                                                                                                                                                                                                                                                                                                                                                                                                                                                                                                                                                                                                                                                                                                                                                                                                                                                                                                                                                                                                                                                                                                                                                                                                                                                                                                                                                                                                                                                                                                                                                                                                                                                                                                                                                                                                                                                                                                                                                                                                                                                                                                                                                                                                                                                                                                                                                                                                                                                                                              |
| <b>Order of Authors Secondary Information:</b> |                                                                                                                                                                                                                                                                                                                                                                                                                                                                                                                                                                                                                                                                                                                                                                                                                                                                                                                                                                                                                                                                                                                                                                                                                                                                                                                                                                                                                                                                                                                                                                                                                                                                                                                                                                                                                                                                                                                                                                                                                                                                                                                                                                                                                                                                                                                                                                                                                                                                                                                                                                                                                                                                                                                                                                      |
| <b>Response to Reviewers:</b>                  | <p>Re: GIGA-D-23-00321</p> <p>Proteome-wide association study and functional validation identify novel protein markers for pancreatic ductal adenocarcinoma</p> <p>Authors' responses to reviewers (Page and line numbers in our responses refer to the revised version of the manuscript with TRACK CHANGES)</p> <p>Reviewer #1:</p> <p>Proteome-Wide Association Study (PWAS) marks a significant advancement in biomedical research, bears great potential in identifying protein biomarkers linked to cancer's onset, progression, and treatment response, which are crucial for early detection, diagnosis, and monitoring. In the present study, Jingjing et al. leverage genome and plasma proteome data from 2,481 healthy individuals of European descent from the INTERVAL study to develop protein genetic prediction models. Their PWAS investigation, using these models, aims to identify potential protein markers for cancer. They notably pinpoint two novel proteomic markers, GOLM1 and B4GALT1, that may significantly influence pancreatic ductal adenocarcinoma cell behaviors.</p> <p>In general, this pioneering PWAS work in exploring genetically predicted blood protein concentrations and their association with PDAC risk is undeniably a breakthrough in cancer research. However, the second part of this study, namely the process used to screen out GOLMA1 and B4GALT1 raised some questions and concerns.</p> <p>Specifically In the words from 364 to line 367. The authors claimed that "Among the 16 novel associated proteins, analysis of TGCA data also revealed potential relevance of B4GT1 and GOLM1 with tumor development (data not shown). Consequently, these two proteins were selected as the targets for experimental validation to further investigate their potential roles in PDAC development." I don't understand why they addressed "data not shown". The absence of this crucial data and the rationale for prioritizing these two proteins over other 14 proteins are not clear. This omission is particularly concerning as neither B4GT1 nor GOLM1 is listed in Supplementary Table 2 as having relevant somatic mutations using TCGA data.</p> <p>Response-1:<br/>Thank you very much for your insightful comments and suggestions concerning our paper. We agree that these points are pivotal for understanding the unique significance of B4GT1 and GOLM1. Please allow us to provide further information to clarify these issues.</p> <p>Regarding your point on "data not shown", to substantiate our selection of B4GT1 and GOLM1, we have now included the analysis result of TCGA data as supplementary figures (Supplementary Fig. 2 and 3). In brief, we have conducted a comprehensive</p> |

bioinformatic analysis leveraging data from TCGA, which clearly indicated the potential relevance of B4GALT1 and GOLM1 with pancreatic tumor development. We apologize for the omission in the previous version of the manuscript.

Page 12, Lines 274-286:

Gene Expression and Survival Analysis with TCGA Database

The examination of GOLM1 and B4GALT1 gene expressions in Pancreatic Adenocarcinoma (PAAD) was conducted using GEPIA (Gene Expression Profiling Interactive Analysis). The platform, accessible at the following web link:

<http://gepia.cancer-pku.cn/>, facilitated analysis with a dataset consisting of 179 tumor samples and 171 normal controls. The focus of survival analysis was exclusively on PAAD, leveraging TCGA data through the GEPIA web server.

Customized gene selection, normalization, and survival methodologies were implemented to suit the unique characteristics of PAAD. Cohort thresholds were defined, restricting dataset selection to PAAD, and survival plots were generated. These measures were designed to precisely identify the correlation between gene expression and survival outcomes specific to this type of cancer.

Page 18, Lines 423-439:

Among the 16 novel associated proteins, analysis of TCGA data also revealed potential relevance of B4GT1 and GOLM1 with tumor development (Supplementary Figure 2 and 3). The examination of GOLM1 and B4GALT1 gene expression in PADD cancer was conducted using GEPIA (Gene Expression Profiling Interactive Analysis). The analysis involved a dataset consisting of 179 tumor samples and 171 normal controls. The box plot analysis revealed a statistically significant increase in GOLM1 (Supplementary Figure 2A) and B4GALT1 (Supplementary Figure 3A) expression in the tumor samples as compared with the normal control group. GEPIA, accessible through the following web link: <http://gepia.cancer-pku.cn/>, served as the platform for this investigation. The survival analysis of GOLM1 and B4GALT1 gene expression in PADD cancer was conducted using GEPIA. Survival plots revealed a significant decrease in overall survival (OS) and disease-free survival (DFS) among tumor samples exhibiting elevated GOLM1 or B4GALT1 expression (n=89) compared with those with low expression (n=89). Employing the Log-rank test for hypothesis testing, our findings emphasize a noteworthy correlation between heightened gene expression and reduced OS and DFS in the PADD cancer cohort (Supplementary Figure 2B, C, Supplementary Figure 3B, C).

I could understand that due to the novelty of PWAS, the authors are able to successfully identified B4GT1 and GOLM1 as important markers at proteomic level. However, through literature search, there is very limited published peer-reviewed papers to show them play any roles in Pancreatic ductal adenocarcinoma in other omics level, like genetics, genomics, transcriptomics.

Response-2:

Thanks for your comment. Your statement underlines a relevant point about the yet unclear roles of B4GT1 and GOLM1 at other omics levels in pancreatic ductal adenocarcinoma. We think that this indeed underscores the potential of our innovative PWAS design in uncovering novel proteins that could not have been identified if we use another design focusing on other omics level. As described above in another response, after we identified these two proteins, when we focused on their RNA expression levels, we could identify additional evidence at RNA levels showing their potential relevance with PDAC.

Were the other 14 proteins subjected to similar experimental protocols, and if so, what were the findings? This information is vital for understanding the unique significance of B4GT1 and GOLM1 in this context.

Response-3:

Thanks for your comment. We conducted a bioinformatics analysis using the GEPIA online TCGA tool to investigate the survival rates associated with the expression of the 16 genes encoding the novel proteins with genetically predicted concentrations in plasma linked to PDAC risk. The findings indicate that, in pancreatic adenocarcinoma (PAAD), GOLM1, B4GALT1, FAM20B, FAB3D, and LRPAP1 exhibit significantly higher expression in tumor tissues, and they are associated with noteworthy survival

rate differences among patients. Further validation through mRNA PCR tests in normal Human Pancreatic Duct Epithelial Cell Line and pancreatic cancer cell lines (PANC-1, SU.86.86) revealed that only GOLM1 and B4GALT1 displayed elevated expression in pancreatic cancer cell lines. Consequently, for subsequent biological investigations, GOLM1 and B4GALT1 were selected due to their distinct high expression in pancreatic cancer cell lines, suggesting their potential relevance to the pathogenesis of pancreatic cancer.

Experimental studies to validate the role of all 16 novel proteins would be exhaustive in terms of resources and time. Given the supportive associations of B4GALT1 and GOLM1 revealed by the TCGA data, it was prudent to prioritize these two for experimental validation, in the current stage of study. We believe this maybe the most efficient strategy to follow up on a large number of candidates generated from a high-throughput PWAS, but agree that the other 14 proteins certainly warrant further investigation.

Finally, concerning the other 14 proteins, although they were not subjected to the same experimental protocols, ongoing studies in our lab are focused on further analyzing these proteins in vitro and in vivo to better understand their roles in PDAC. As these studies were not included in the current manuscript, we would be delighted to share our findings in an appropriate future publication.

We hope these explanations address your concerns, and we thank you again for improving the quality of our work through your insightful comments.

Reviewer #2:

Zhu et al. constructed a series of pQTL models and used them to identify genetic predicted serum protein markers for pancreatic ductal adenocarcinoma, followed by a series of functional validations, which may provide valuable clues for prediction and treatment of PDAC. I have several concerns on this study.

Major concerns:

1. This study integrated both cis- and trans-acting elements to construct pQTL models. It would be better to provide the heritability of each pQTL model constructed and the comparison results (such as the  $h^2$  explained and predictive performance on gene expression) with those focus solely on cis-acting variants, as the author stated that the integration strategy has an enhanced statistical power.

Rresponse-1:

Thank you very much for your insightful comments. We have compared  $h^2$  of the prediction models between those with cis+trans factors and only cis genetic factors. The results indeed showed that when involving trans-acting elements, enhanced statistical power could be achieved.

Page 8, Lines 181-185:

We also estimated the genetic heritability of plasma proteins (the proportion of the variation of protein levels that could be explained by potential predictors) using GCTA1. We compared the heritability of plasma proteins when using cis+trans SNPs vs only cis SNPs to assess whether it could capture more heritability when involving trans-SNPs.

Page 16, Lines 376-383:

We compared the heritability of the prediction models established using cis+trans and vs cis-only predictors strategies. Here, we focused on the 490 models established using both cis and trans SNPs in the main analysis. The results showed that 250 out of the 490 (51.02%) models have higher estimated heritability with the cis+trans strategy (Supplementary Table 2), and 215 proteins (43.88%) showed the same estimated heritability between cis+trans and cis-only strategies (Supplementary Table 2). Only 25 proteins (5.10%) showed lower estimated heritability when using cis+trans strategy (Supplementary Table 2). These results showed that trans SNPs could in general increase heritability of the prediction models.

2. The integration strategy is somewhat like some PGS methods (such as C+T). Would the author consider to try some other strategies used in common PGS analysis? For example, using LD clumping for SNPs selection, trying some other P value threshold combinations to define and select gene-associated SNPs in cis and trans regions, and using the bsimm strategy, which seems to be demonstrated to have decent performance in the FUSION article.

Rresponse-2:

We thank the reviewer for the comments. We have now performed several additional robustness analyses, including using the bsimm method, LD clumping for SNP selection, and different p-value thresholds. The results show that our results are robust under different methods/thresholds.

Page 10, Lines 220-233:

Robustness analyses

To further examine whether the identified significant associations from the main analyses may be robust to different strategies, three alternative strategies were used to test these proteins under different scenarios. Firstly, we established prediction models using the bsimm method embedded in TWAS/FUSION software. This method was not enabled by the default parameter due to the intensive Markov chain Monte Carlo (MCMC) computation, although bsimm has some advantages and might increase prediction accuracy in some conditions. Secondly, we pruned the highly correlated SNPs and only SNPs that are weakly correlated with each other were used as potential predictors. In the current analysis, we pruned SNPs using pruning parameters  $r^2 = 0.1$  and distance = 250 kb. Thirdly, we assessed the robustness of the significant association results by examining different p-value cutoffs for selecting informative trans-regions (p-value  $< 5 \times 10^{-7}$ , p-value  $< 5 \times 10^{-9}$ , and p-value  $< 5 \times 10^{-10}$ ) as candidate predictors for model building. The association results with a nominal p-value  $< 0.05$  and consistent effect direction were considered to be replicated.

Page 16, Lines 384-393:

The robustness analysis showed that all the 40 significantly PDAC-associated proteins had the same effect directions (Supplementary Table 3). A total of 39 proteins could be tested using the bsimm method and 37 out of 39 (94.87%) could be replicated (except for SEMA6A and CHST11 proteins). When we removed highly correlated SNPs and only weak correlated SNPs were used for establishing prediction models, a total of 39 prediction models were established. The association results showed that associations of 38 out of the 39 (97.44%) proteins could be replicated (Supplementary Table 3). In addition, three different p-value thresholds (p-value  $< 5 \times 10^{-7}$ , p-value  $< 5 \times 10^{-9}$ , and p-value  $< 5 \times 10^{-10}$ ) for selecting trans-SNPs were examined (Supplementary Table 3). All the association results were consistent with those in our main analysis. The above results showed the robustness of our main results.

3. This study selected proteins for pWAS analysis based on prediction R/R<sup>2</sup> of pQTL models. Would the author take the h<sup>2</sup> of each pQTL model into consideration as the FUSION article did?

Rresponse-3:

We thank the reviewer for the comments. The  $R^2 \geq 0.01$  was a common threshold used in previous relevant omics integration studies. Here we also added the information of h<sup>2</sup> estimated using the GCTA software in the revised manuscript (main text as well as Tables 1 and 2) 1.

Page 8, Lines 174-175:

$R^2 \geq 0.01$  was used as the threshold for selecting satisfactory prediction models, which is commonly used in relevant omics integration studies.

Page 15, Lines 361-362:

The heritability of the proteins ranged from 0.001 to 0.87, with an average value of 0.14.

4. Although the author used the TWAS/FUSION framework for pQTL models construction and protein-PDAC association assessment, it would be better to add more description into the supplementary file on how this framework was applied to the

|                                                                                                                                                                                                                                                                                                                                                                                                                                                                                                                                     |                                                                                                                                                                                                                                                                                                                                                                                                                                                                                                                                                                                                                                                                                                                                                                                                             |
|-------------------------------------------------------------------------------------------------------------------------------------------------------------------------------------------------------------------------------------------------------------------------------------------------------------------------------------------------------------------------------------------------------------------------------------------------------------------------------------------------------------------------------------|-------------------------------------------------------------------------------------------------------------------------------------------------------------------------------------------------------------------------------------------------------------------------------------------------------------------------------------------------------------------------------------------------------------------------------------------------------------------------------------------------------------------------------------------------------------------------------------------------------------------------------------------------------------------------------------------------------------------------------------------------------------------------------------------------------------|
|                                                                                                                                                                                                                                                                                                                                                                                                                                                                                                                                     | <p>current study.<br/> Rspose-4:<br/> We thank the reviewer for the comments. We have now added more descriptions of the way we performed the association assessment.</p> <p>Page 9, Lines 212-216:<br/> We calculated the PWAS test statistic Z-score = <math>w'Z/(w'\Sigma_s,sw)^{1/2}</math>, where the Z is a vector of standardized effect sizes of SNPs for a given protein (Wald z-scores), w is a vector of prediction weights for the abundance feature of the protein being tested, and the <math>\Sigma_s,s</math> is the LD matrix of the SNPs estimated from the 1000 Genomes Project as the LD reference panel.</p> <p>Reference<br/> 1. Yang, J., Lee, S. H., Goddard, M. E. &amp; Visscher, P. M. GCTA: a tool for genome-wide complex trait analysis. Am J Hum Genet 88, 76–82 (2011).</p> |
| <b>Additional Information:</b>                                                                                                                                                                                                                                                                                                                                                                                                                                                                                                      |                                                                                                                                                                                                                                                                                                                                                                                                                                                                                                                                                                                                                                                                                                                                                                                                             |
| <b>Question</b>                                                                                                                                                                                                                                                                                                                                                                                                                                                                                                                     | <b>Response</b>                                                                                                                                                                                                                                                                                                                                                                                                                                                                                                                                                                                                                                                                                                                                                                                             |
| Are you submitting this manuscript to a special series or article collection?                                                                                                                                                                                                                                                                                                                                                                                                                                                       | No                                                                                                                                                                                                                                                                                                                                                                                                                                                                                                                                                                                                                                                                                                                                                                                                          |
| <p><b>Experimental design and statistics</b></p> <p>Full details of the experimental design and statistical methods used should be given in the Methods section, as detailed in our <a href="#">Minimum Standards Reporting Checklist</a>. Information essential to interpreting the data presented should be made available in the figure legends.</p> <p>Have you included all the information requested in your manuscript?</p>                                                                                                  | Yes                                                                                                                                                                                                                                                                                                                                                                                                                                                                                                                                                                                                                                                                                                                                                                                                         |
| <p><b>Resources</b></p> <p>A description of all resources used, including antibodies, cell lines, animals and software tools, with enough information to allow them to be uniquely identified, should be included in the Methods section. Authors are strongly encouraged to cite <a href="#">Research Resource Identifiers</a> (RRIDs) for antibodies, model organisms and tools, where possible.</p> <p>Have you included the information requested as detailed in our <a href="#">Minimum Standards Reporting Checklist</a>?</p> | Yes                                                                                                                                                                                                                                                                                                                                                                                                                                                                                                                                                                                                                                                                                                                                                                                                         |



|                                                                                                                                                                                                                                                                                                                                                                                                                                                                                                                                                         |            |
|---------------------------------------------------------------------------------------------------------------------------------------------------------------------------------------------------------------------------------------------------------------------------------------------------------------------------------------------------------------------------------------------------------------------------------------------------------------------------------------------------------------------------------------------------------|------------|
| <p><b>Availability of data and materials</b></p> <p>All datasets and code on which the conclusions of the paper rely must be either included in your submission or deposited in <a href="#">publicly available repositories</a> (where available and ethically appropriate), referencing such data using a unique identifier in the references and in the “Availability of Data and Materials” section of your manuscript.</p> <p>Have you have met the above requirement as detailed in our <a href="#">Minimum Standards Reporting Checklist?</a></p> | <p>Yes</p> |
|---------------------------------------------------------------------------------------------------------------------------------------------------------------------------------------------------------------------------------------------------------------------------------------------------------------------------------------------------------------------------------------------------------------------------------------------------------------------------------------------------------------------------------------------------------|------------|



1 **Proteome-wide association study and functional validation identify novel protein markers**  
2 **for pancreatic ductal adenocarcinoma**

3

4 Jingjing Zhu<sup>1\*</sup>, Ke Wu<sup>2\*</sup>, Shuai Liu<sup>3\*</sup>, Alexandra Masca<sup>3</sup>, Hua Zhong<sup>3</sup>, Tai Yang<sup>4</sup>, Dalia H  
5 Ghoneim<sup>3</sup>, Praveen Surendran<sup>5</sup>, Tanxin Liu<sup>6</sup>, Qizhi Yao<sup>7,8</sup>, Tao Liu<sup>9</sup>, Sarah Fahle<sup>5</sup>, Adam  
6 Butterworth<sup>5,10</sup>, Md Ashad Alam<sup>11</sup>, Jaydutt V. Vadgama<sup>2</sup>, Youping Deng<sup>1</sup>, Hong-Wen Deng<sup>11</sup>,  
7 Chong Wu<sup>12#</sup>, Yong Wu<sup>2#</sup>, Lang Wu<sup>3#</sup>

8 1. Department of Quantitative Health Sciences, John A. Burns School of Medicine, University of  
9 [Hawai'i](#) at [Mānoa](#), Honolulu, HI, USA

10 2. Division of Cancer Research and Training, Department of Internal Medicine, Charles R. Drew  
11 University of Medicine and Science, David Geffen UCLA School of Medicine and UCLA  
12 Jonsson Comprehensive Cancer Center, Los Angeles, CA 90095, USA

13 3. Cancer Epidemiology Division, Population Sciences in the Pacific Program, University of  
14 [Hawai'i](#) Cancer Center, University of [Hawai'i](#) at [Mānoa](#), Honolulu, HI, USA

15 4. Department of Biostatistics, University of Michigan - Ann Arbor, MI, USA

16 5. MRC/BHF Cardiovascular Epidemiology Unit, Department of Public Health and Primary  
17 Care, University of Cambridge, Cambridge, UK

18 6. Department of Epidemiology, Johns Hopkins Bloomberg School of Public Health, Baltimore,  
19 MD, USA

20 7. Division of Surgical Oncology, Michael E. DeBakey Department of Surgery, Baylor College  
21 of Medicine, Houston, Texas

22 8. Center for Translational Research on Inflammatory Diseases (CTRID), Michael E. DeBakey  
23 VA Medical Center, Houston, Texas

24 9. Biological Sciences Division, Pacific Northwest National Laboratory, Richland, WA 99354,  
25 USA

26 10. NIHR Blood and Transplant Research Unit in Donor Health and Genomics, Department of  
27 Public Health and Primary Care, University of Cambridge, Cambridge, UK

28 11. Tulane Center for Biomedical Informatics and Genomics, Division of Biomedical  
29 Informatics and Genomics, Deming Department of Medicine, Tulane University, 1440 Canal  
30 Street, New Orleans, 70112, LA, USA

31 12. Department of Biostatistics, The University of Texas MD Anderson Cancer Center, Houston,  
32 TX, USA

33 \* these authors contributed equally to this work and are co-first authors

34 # these authors jointly supervised this work and are co-senior authors

35

36 **Running title:** Predicted protein biomarkers for pancreatic cancer

37

38

39 **Corresponding to:** Lang Wu, Cancer Epidemiology Division, Population Sciences in the Pacific  
40 Program, University of [Hawai‘i](#) Cancer Center, University of [Hawai‘i](#) at [Mānoa](#), Honolulu, HI,  
41 96813, USA. Email: [lwu@cc.hawaii.edu](mailto:lwu@cc.hawaii.edu). Phone: (808)564-5965; or Yong Wu, Department of  
42 Internal Medicine, Charles Drew University of Medicine and Science, Los Angeles, CA 90059,  
43 USA. Email: [yongwu@cdrewu.edu](mailto:yongwu@cdrewu.edu); or Chong Wu, Department of Biostatistics, The University  
44 of Texas MD Anderson Cancer Center, Houston, TX, USA. Email: [cwu18@mdanderson.org](mailto:cwu18@mdanderson.org)

45

46

47

48

49

50

51

52

53

54

55

56

57

58

59

60

**61 Abstract**

62 Pancreatic ductal adenocarcinoma (PDAC) remains a lethal malignancy, largely due to the  
63 paucity of reliable biomarkers for early detection and therapeutic targeting. Existing blood  
64 protein biomarkers for PDAC often suffer from replicability issues, arising from inherent  
65 limitations such as unmeasured confounding factors in conventional epidemiologic study  
66 designs. To circumvent these limitations, we use genetic instruments to identify proteins with  
67 genetically predicted levels to be associated with PDAC risk. Leveraging genome and plasma  
68 proteome data from the INTERVAL study, we established and validated models to predict  
69 protein levels using genetic variants. By examining 8,275 PDAC cases and 6,723 controls, we  
70 identified 40 associated proteins, of which 16 are novel. Functionally validating these candidates  
71 by focusing on two selected novel protein-encoding genes, *GOLM1* and *B4GALT1*, we  
72 demonstrated their pivotal roles in driving PDAC cell proliferation, migration, and invasion.  
73 Furthermore, we also identified potential drug repurposing opportunities for treating PDAC.

**74 Significance:**

75 PDAC is a notoriously difficult-to-treat malignancy, and our limited understanding of causal  
76 protein markers hampers progress in developing effective early detection strategies and  
77 treatments. Our study identifies novel causal proteins using genetic instruments and subsequently  
78 functionally validates selected novel proteins. This dual approach enhances our understanding of  
79 PDAC etiology and potentially opens new avenues for therapeutic interventions.

80 **Keywords:** Biomarkers, protein, genetics, pancreatic cancer, risk

81

82

83

**84 Introduction**

85 Pancreatic cancer is the seventh leading cause of cancer deaths in industrialized countries  
86 with pancreatic ductal adenocarcinoma (PDAC) making up over 90% of pancreatic cancer cases  
87 (1). According to GLOBOCAN 2020 cancer statistics, pancreatic cancer is the 14th most  
88 common cancer type with 495,773 new cases in 2020. There are almost the same number of  
89 deaths caused by pancreatic cancer (466,003 deaths) in 2020, accounting for 4.7% of all cancer  
90 related deaths (2). Owing to its often asymptomatic or non-specific symptoms during early  
91 stages, a majority of patients are usually diagnosed in advanced stages. This results in 80-90% of  
92 pancreatic tumors being unresectable upon diagnosis, leading to a dismal prognosis: a mere 9%  
93 five-year survival rate after diagnosis (1). Given these dire statistics, there is an urgent need to  
94 identify effective biomarkers for screening or early detection in high-risk populations. Equally  
95 crucial is the development of improved therapeutic strategies to improve PDAC outcome.

96 Currently, serum cancer antigen (CA) 19-9 is the only diagnostic biomarker for  
97 pancreatic cancer approved by the U.S. FDA. However, elevated levels of CA 19-9 are related to  
98 other conditions, and its performance as a diagnostic tool for pancreatic cancer is far from ideal  
99 (3): it has a poor positive predictive value (0.5-0.9%), along with restricted specificity (82-90%)  
100 and sensitivity (79-81%). Previous studies have also reported several other circulating blood  
101 protein biomarkers that are potentially associated with pancreatic cancer risk, such as CA242,  
102 PIVKA-II, and PAM4 (4-7). However, results from existing studies often involving small sample  
103 sizes and findings are inconsistent. It is well known that the conventional epidemiologic study  
104 design measuring levels of proteins directly may be subject to selection bias and residual or

105 unmeasured confounding, which could also contribute to the inconsistent findings in the existing  
106 literature.

107         An alternative design of using genetic instruments may decrease many limitations of  
108 existing studies, due to the nature of random assortment of alleles from parents to offspring  
109 during gamete formation (8,9). Inspired by transcriptome-wide association study (TWAS), one  
110 may build comprehensive genetic prediction models for each protein to capture the prediction  
111 value of multiple single nucleotide polymorphisms (SNPs). Unlike conventional TWAS type of  
112 methods, which typically focus solely on cis-acting variants, our study enhanced statistical power  
113 by integrating both cis- and trans-acting elements into our genetic prediction models.  
114 Furthermore, as TWAS or PWAS results imply causality under stringent valid instrumental  
115 variable assumptions, we further functionally validated two novel proteins.

116         In the current study, we applied such a study design to identify novel proteins associated  
117 with PDAC risk. To our knowledge, this is the first large-scale proteome wide association study  
118 (PWAS) using comprehensive protein genetic prediction models as instruments to assess the  
119 associations between genetically predicted blood concentrations of proteins and PDAC risk. We  
120 used data for 8,275 cases and 6,723 controls of European descent from the Pancreatic Cancer  
121 Cohort Consortium (PanScan) and the Pancreatic Cancer Case-Control Consortium (PanC4).  
122 Beyond identifying novel proteins, we functionally validated two of them. Moreover, we  
123 generated a list of drugs targeting the identified proteins which may serve as candidates for drug  
124 repurposing of PDAC.

125

## 126 **Methods**

### 127 *Protein genetic prediction model development and validation*

128 We leveraged the genome and plasma proteome data of healthy European subjects  
129 included in the INTERVAL study to establish (subcohort1) and validate (subcohort2) protein  
130 genetic prediction models. The details of the INTERVAL study data have been published  
131 previously (10-14). Briefly, participants were generally healthy. The SOMAscan assay was used  
132 to collect the relative levels of 3,620 plasma proteins or complexes. Quality control (QC) was  
133 performed at both the sample and SOMAmer level. Approximately ~830,000 genetic variants  
134 were measured on the Affymetrix Axiom UK Biobank genotyping array. Standard sample and  
135 variant QC were conducted. SNPs were phased using SHAPEIT3 and imputed using a combined  
136 1000 Genomes Phase 3-UK10K reference panel, which resulted in over 87 million imputed  
137 variants. The SNPs were further filtered using criteria of 1) imputation quality of at least 0.7, 2)  
138 minor allele count of at least 5%, 3) Hardy Weinberg Equilibrium (HWE)  $p \geq 5 \times 10^{-6}$ , (4) missing  
139 rates < 5%, and (5) presenting in the 1000 Genome Project data for European populations.  
140 Overall there were 4,662,360 variants passing these criteria.

141 In subcohort 1 (N=2,481), as described elsewhere (10), protein concentrations were log  
142 transformed and adjusted for age, sex, duration between blood draw and processing, and the top  
143 three principal components. For the rank-inverse normalized residuals of each protein, we  
144 followed the TWAS/FUSION framework to establish prediction models, using nearby variants  
145 (within 100kb) of potentially associated SNPs as candidate predictors (15). A false discovery rate  
146 (FDR) < 0.05 was used to determine potentially associated SNPs in cis regions (within 1 Mb of  
147 the transcriptional start site (TSS) of the gene encoding the target protein of interest) and  $P$ -value  
148  $\leq 5 \times 10^{-8}$  was used to determine potentially associated SNPs in trans regions. We only included  
149 strand unambiguous SNPs. Four methods of best linear unbiased predictor (blup), elastic net,  
150 LASSO, and top1 were used to develop the models. For each protein of interest, the model

151 showing the most significant cross-validation  $P$ -value among those developed using the four  
152 methods was selected.  $R^2 \geq 0.01$  was used as the threshold for selecting satisfactory prediction  
153 models, which is commonly used in relevant omics integration studies (16-30). For protein  
154 prediction models with  $R^2 \geq 0.01$ , external validation was conducted using genetic and protein  
155 data of subcohort 2 (N=820). Briefly, predicted protein expression levels were estimated by  
156 applying the developed protein prediction models to the genetic data, which were further  
157 compared with the measured levels for each protein of interest. Proteins with a model prediction  
158  $R^2$  of  $\geq 0.01$  in subcohort1 and a correlation coefficient of  $\geq 0.1$  in subcohort2 were selected for  
159 association analysis with PDAC risk. We also estimated the genetic heritability of plasma  
160 proteins (the proportion of the variation of protein levels that could be explained by potential  
161 predictors) using GCTA (31). We compared the heritability of plasma proteins when using  
162 *cis+trans* SNPs vs only *cis* SNPs to assess whether it could capture more heritability when  
163 involving *trans*-SNPs.

164

#### 165 *Examine associations of genetically predicted protein levels with PDAC risk*

166 To investigate the associations between genetically predicted circulating protein levels  
167 and PDAC risk, the validated protein genetic prediction models were applied to the summary  
168 statistics from a large GWAS of PDAC risk. In the present work, we used data from GWAS  
169 conducted in the PanScan and PanC4 consortia downloaded from the database of Genotypes and  
170 Phenotypes (dbGaP), including 8,275 PDAC cases and 6,723 controls of European ancestry.  
171 Detailed information on this dataset has been included elsewhere (17,20,32). Briefly, four  
172 GWAS studies, namely, PanScan I, PanScan II, PanScan III, and PanC4, were genotyped using  
173 the Illumina HumanHap550, 610-Quad, OmniExpress, and OmniExpressExome arrays,



174 respectively. Standard QC procedures were performed according to the consortia guidelines (32).  
175 Study participants who were related to each other, had sex discordance, had genetic ancestry  
176 other than Europeans, had a low call rate (less than 98% and 94% in PanC4 and PanScan,  
177 respectively), or had missing information on age or sex were excluded. Duplicated SNPs, and  
178 those with a high missing call rate (at least 2% and 6% in PanC4 and PanScan, respectively) or  
179 with violations of Hardy-Weinberg equilibrium (HWE) ( $P < 1 \times 10^{-4}$  and  $P < 1 \times 10^{-7}$  in PanC4 and  
180 PanScan, respectively), were also removed. Regarding SNP data from PanC4, those with minor  
181 allele frequency  $< 0.005$ , with more than two discordant calls in duplicate samples, with more  
182 than one Mendelian error in HapMap control trios, and those with sex difference in allele  
183 frequency  $> 0.2$  or in heterozygosity  $> 0.3$  for autosomes/XY in European descendants were  
184 further removed. We performed genotype imputation using Minimac3 after prephasing with  
185 SHAPEIT from a reference panel of the Haplotype Reference Consortium (r1.1 2016) (33,34).  
186 We retained imputed SNPs with an imputation quality of  $\geq 0.3$ . The associations between  
187 individual genetic variants and PDAC risk were further estimated adjusting for age, sex and top  
188 principal components. The TWAS/FUSION framework was used to assess the protein-PDAC  
189 risk associations, by leveraging correlations between variants included in the prediction models  
190 based on the phase 3, 1000 Genomes Project data for European populations (15). We calculated  
191 the PWAS test statistic  $Z$ -score =  $w'Z/(w'\Sigma_{s,s}w)^{1/2}$ , where the  $Z$  is a vector of standardized effect  
192 sizes of SNPs for a given protein (Wald  $z$ -scores),  $w$  is a vector of prediction weights for the  
193 abundance feature of the protein being tested, and the  $\Sigma_{s,s}$  is the LD matrix of the SNPs estimated  
194 from the 1000 Genomes Project as the LD reference panel. We used the false discovery rate  
195 (FDR) corrected  $P$ -value threshold of  $\leq 0.05$  to determine significant associations between  
196 genetically predicted protein concentrations and risk of PDAC.

197  
198  
199  
200  
201  
202  
203  
204  
205  
206  
207  
208  
209  
210  
211  
212

### **Robustness analyses**

To further examine whether the identified significant associations from the main analyses may be robust to different strategies, three alternative strategies were used to test these proteins under different scenarios. Firstly, we established prediction models using the bsimm method embedded in TWAS/FUSION software. This method was not enabled by the default parameter due to the intensive Markov chain Monte Carlo (MCMC) computation, although bsimm has some advantages and might increase prediction accuracy in some conditions. Secondly, we pruned the highly correlated SNPs and only SNPs that are weakly correlated with each other were used as potential predictors. In the current analysis, we pruned SNPs using pruning parameters  $r^2 = 0.1$  and distance = 250 kb. Thirdly, we assessed the robustness of the significant association results by examining different  $p$ -value cutoffs for selecting informative *trans*-regions ( $p$ -value  $< 5 \times 10^{-7}$ ,  $p$ -value  $< 5 \times 10^{-9}$ , and  $p$ -value  $< 5 \times 10^{-10}$ ) as candidate predictors for model building. The association results with a nominal  $p$ -value  $< 0.05$  and consistent effect direction were considered to be replicated.

### ***Somatic variants of genes encoding associated proteins***

For each of the genes encoding the proteins that are identified to be associated with PDAC risk, we evaluated potentially deleterious somatic level mutations in 150 PDAC patients included in The Cancer Genome Atlas (TCGA). The potentially deleterious somatic variants include missense mutations, splice site mutations, nonstop mutations, nonsense mutations, frameshift mutations, in-frame mutations and translation start site mutations.

219 The somatic level genetic changes were called using MuTect2  
220 (doi: <https://doi.org/10.1101/861054>) and deposited to the TCGA data portal. The enrichment of  
221 proportion of assessed genes containing such somatic level genetic events compared with the  
222 proportion of all protein-coding genes across the genome was evaluated using socscistatistics  
223 online website (<https://www.socscistatistics.com/tests/ztest/default2.aspx>).

#### 224 *Ingenuity Pathway Analysis (IPA) and Protein-Protein Interaction (PPI) analysis*

225 To further assess whether genes encoding the identified PDAC associated proteins are  
226 enriched in specific pathways, molecular and cellular functions, and networks, we performed the  
227 enrichment analysis using Ingenuity Pathway Analysis (IPA) software (35). The "enrichment"  
228 score (Fisher exact test  $P$  value) that measures overlap of observed and predicted regulated gene  
229 sets was generated for each of the tested gene sets. The most significant pathways and functions  
230 with an enrichment  $P$  value less than 0.05 were reported. We also built protein-protein  
231 interaction (PPI) network using STRING database version 11.5 (<https://string-db.org/>) with  
232 0.400 confidence level (36). The STRING database integrates different curated databases  
233 containing information on known and predicted functional protein–protein associations.

#### 234 *Drug repurposing analysis*

235 For the identified proteins, we further assessed whether there is any evidence supporting  
236 their potential roles in PDAC by using the OpenTargets (37). Focusing on those showing a  
237 potential relevance, we further mined evidence of their targeting drugs using the DrugBank (38)  
238 database. We also conducted molecular docking analysis for the identified proteins and  
239 corresponding candidate drug agents (39). Specifically, we downloaded the 3D structure of  
240 targeted proteins from Protein Data Bank (PDB) (40) with source code 1CPB, 3CDZ, 1IGR,

241 3DFK, 5NO06, and drug agents from the PubChem database (41). We further worked out  
242 molecular docking between each of the proteins and the corresponding meta-drug agents to  
243 calculate the binding affinity scores (kcal/mol) for each pair of proteins and drugs.

244

### 245 *In vitro functional validation of genes encoding selected associated novel proteins*

#### 246 **Cell Lines and Culture Condition**

247 Human pancreatic cancer cell lines PANC-1 and SU.86.86 were obtained from ATCC  
248 (American Type Culture Collection). All cells were cultured in vitro in DMEM (Dulbecco's  
249 modified eagle medium) high glucose medium (Gibco, Novato, CA, United States) supplemented  
250 with 10% (v/v) fetal bovine serum (FBS) (Gibco). Cells were incubated at 37°C with 5% CO<sub>2</sub>.

251

#### 252 Gene Expression and Survival Analysis with TCGA Database

253

254 The examination of *GOLM1* and *B4GALT1* gene expressions in Pancreatic  
255 Adenocarcinoma (PAAD) was conducted using GEPIA (Gene Expression Profiling Interactive  
256 Analysis). The platform, accessible at the following web link: <http://gepia.cancer-pku.cn/>,  
257 facilitated analysis with a dataset consisting of 179 tumor samples and 171 normal controls. The  
258 focus of survival analysis was exclusively on PAAD, leveraging TCGA data through the GEPIA  
259 web server.

260 Customized gene selection, normalization, and survival methodologies were implemented  
261 to suit the unique characteristics of PAAD. Cohort thresholds were defined, restricting dataset  
262 selection to PAAD, and survival plots were generated. These measures were designed to precisely  
263 identify the correlation between gene expression and survival outcomes specific to this type of  
264 cancer.

265

**266 Western blotting**

267           Post 72-hour silencing, we processed control, B4GALT1-silenced, and GOLM1-silenced  
268 cells for Western blotting. Cells were lysed using RIPA buffer, and equal protein amounts were  
269 separated on 10% or 12% SDS polyacrylamide gels, then transferred onto PVDF membranes. To  
270 prevent non-specific antibody binding, membranes were blocked with 5% milk in TBS with 0.1%  
271 Tween for an hour. They were then probed with anti-B4GALT1, anti-GOLM1, and anti-GAPDH  
272 antibodies, followed by their respective HRP-conjugated secondary antibodies. Signal detection  
273 was performed using Pierce™ ECL Western Blotting Substrate and images were captured and  
274 analyzed using Odyssey FC and ImageStudio Software.

275

**276 Quantitative Real-Time PCR (qPCR)**

277           Total RNA was extracted from cells using TRNzol reagent according to the manufacturer's  
278 protocol. The concentration of RNA was determined using a UV spectrophotometer.  
279 Subsequently, 2 mg of total RNA was reverse transcribed into cDNA using the iScript™ cDNA  
280 Synthesis Kit. qPCR analysis was performed on the CFX96™ Real-Time PCR Detection System  
281 using the iTaq™ Universal SYBR® Green Supermix. The aim was to detect the expression levels  
282 of three genes: B4GALT1, GOLM1, and GAPDH mRNAs. Specific primer pairs were used for  
283 each gene. For B4GALT1, the forward sequence was GTATTTTGGAGGTGTCTCTGCTC and  
284 the reverse sequence was GGGCGAGATATAGACATGCCTC. For GOLM1, the forward  
285 sequence was ATCACACAGGTGAGAGGCTCA and the reverse sequence was  
286 ACTTCCTCTCCAGGTTGGTCTG. For the housekeeping gene GAPDH, the forward sequence  
287 was GTCTCCTCTGACTTCAACAGCG and the reverse sequence was  
288 ACCACCCTGTTGCTGTAGCCAA. During the qPCR analysis, melting curves were generated

289 to detect primer-dimer formation and confirm the specificity of the gene-specific peaks for each  
290 target. To ensure accurate quantification, the expression data were normalized to the amount of  
291 GAPDH mRNA expressed.

292

### 293 **Transfection of siRNA**

294 The transfection of small-interfering RNA (siRNA) was performed using specific human  
295 siRNAs targeting GOLM1 (SASI\_Hs01\_00223155), B4GALT1 (SASI\_Hs01\_00080445), and the  
296 MISSION siRNA universal negative control, all of which were obtained from Sigma-Aldrich (St.  
297 Louis, MO). Cells were seeded in 6-well plates at a density of  $1.5 \times 10^5$  cells per well and  
298 subsequently transfected with the siRNAs at a concentration of 40 nM. The transfection procedure  
299 utilized the lipofectamine 2000 reagent (Invitrogen, Carlsbad, CA, United States) following the  
300 manufacturer's recommended guidelines. Gene silencing at both mRNA and protein levels was  
301 typically observed 72 h post-transfection. As such, the cells were collected and subjected to assays  
302 at the 72-hour time point to assess the efficacy of gene silencing.

303

### 304 **Cell Proliferation Assay**

305 To observe cell proliferation, cells were transfected with Mock siRNA, siGOLM11 and  
306 siB4GAL1 (40 nM). At 24 h after transfection, the cells were trypsinized and seeded into 96-well  
307 plates (Corning, NY, United States) at a density of 5000 cells/well in 200  $\mu$ l media. The plates  
308 were incubated in a 37°C humidified incubator. On each day for [3-(4,5-dimethylthiazol-2-yl)-5-  
309 (3-carboxymethoxyphenyl)-2-(4-sulfophenyl)-2H-tetrazolium] (MTS) assay.

310

### 311 ***In vitro* invasion assay**

312 Cell invasion was assessed following transfection with Mock siRNA, siGOLM11, and  
313 siB4GAL1 (40 nM). A modified Boyden chamber method was employed. Matrigel (BD  
314 Biosciences) was coated on the upper chamber of Transwell inserts (Corning, 8  $\mu\text{m}$  pore size) at a  
315 concentration of 300  $\mu\text{g}/\text{ml}$ , allowing gel formation for 2 hours at 37°C. Cells ( $5 \times 10^4$ ) were then  
316 suspended in 200  $\mu\text{l}$  of serum-free medium and added to the upper chamber. The lower chamber  
317 contained 600  $\mu\text{l}$  of medium with 10% FBS, acting as a chemoattractant. Following 24 hours of  
318 incubation at 37°C, non-invading cells on the upper membrane surface were gently removed using  
319 a cotton swab. Cells that invaded the lower membrane surface were fixed with 4%  
320 paraformaldehyde and stained with 0.1% crystal violet. Invasion was quantified by counting the  
321 stained cells on the underside of the membrane using a light microscope (10 random fields at 200x  
322 magnification). All experiments were performed in triplicate to ensure robustness of the findings.

323

#### 324 **Wound Scratch assay**

325 After 24 hours of transfection with Mock siRNA, siGOLM11, and siB4GAL1, PANC-1  
326 and SU.86.86 cells were cultured in a 96-well plate to form a monolayer. Using BioTek's  
327 AutoScratch™ Wound Making Tool, straight scratches were carefully created on the cell  
328 monolayer to mimic wounds, following the equipment manual's instructions. Time-lapse images  
329 of the scratches were captured at specific intervals (e.g., 0 hours, 12 hours, 24 hours, etc.) using  
330 the Cytation™ 5 Cell Imaging Multi-Mode Reader. Subsequently, image analysis software was  
331 employed to quantify the closure of the wounds at each time point. Statistical analysis was  
332 performed to compare the wound closure rates at different time points, and the results were  
333 presented graphically.

334



## 335 Results

336 The overall workflow of this study is shown in **Figure 1**. Of the proteins assessed, we  
337 were able to develop prediction models for 1,864 proteins with a prediction performance  
338  $R^2 \geq 0.01$ . In the external validation step, 1,389 of them further demonstrated a correlation  
339 coefficient of  $\geq 0.1$  for predicted expression and measured expression levels. The heritability of  
340 the proteins ranged from 0.001 to 0.87, with an average value of 0.14. Of such proteins, we  
341 observed significant associations between genetically predicted expression levels of 40 proteins  
342 and PDAC risk at a false discovery rate (FDR)  $p$ -value of  $\leq 0.05$  (**Figure 2, Tables 1 and 2**). Of  
343 the associated proteins, 16 are novel ones that have not been reported in previous studies (**Table**  
344 **1**). Positive associations were observed for 10 of these proteins, and inverse associations were  
345 observed for six proteins (**Table 1**). The other 24 associated proteins have been previously  
346 reported in our study using pQTL as instruments (42) (**Table 2**). These include 10 that  
347 demonstrated positive associations and 14 that showed inverse associations.

348 For the other proteins that were reported in our previous study using pQTL as instruments  
349 (42), while did not show a significant association after FDR correction in the current study  
350 (**Supplementary Table 1**), except for sTie-2, the directions of effect were consistent in the  
351 current study compared with those in the published work. Among them, for eight proteins, their  
352 associations were at  $P < 0.05$  in the current work using protein genetic prediction models as  
353 instruments (**Supplementary Table 1**).

354 We compared the heritability of the prediction models established using *cis+trans* and *vs*  
355 *cis-only* predictors strategies. Here, we focused on the 490 models established using both *cis* and  
356 *trans* SNPs in the main analysis. The results showed that 250 out of the 490 (51.02%) models  
357 have higher estimated heritability with the *cis+trans* strategy (**Supplementary Table 2**), and 215

358 proteins (43.88%) showed the same estimated heritability between *cis+trans* and *cis-only*  
359 strategies (**Supplementary Table 2**). Only 25 proteins (5.10%) showed lower estimated  
360 heritability when using the *cis+trans* strategy (**Supplementary Table 2**). These results showed  
361 that *trans* SNPs could in general increase heritability of the prediction models.

362 The robustness analysis showed that all the 40 PDAC-associated proteins had the same  
363 effect directions (**Supplementary Table 3**). A total of 39 proteins could be tested using the  
364 bslmm method and 37 out of the 39 (94.87%) could be replicated (except for SEMA6A and  
365 CHST11 proteins). When we removed highly correlated SNPs and only weak correlated SNPs  
366 were used for establishing prediction models, a total of 39 prediction models were established.  
367 The association results showed that associations of 38 out of the 39 (97.44%) proteins could be  
368 replicated (**Supplementary Table 3**). In addition, three different *p*-value thresholds (*p*-value <  
369  $5 \times 10^{-7}$ , *p*-value <  $5 \times 10^{-9}$ , and *p*-value <  $5 \times 10^{-10}$ ) for selecting *trans*-SNPs were examined  
370 (**Supplementary Table 3**). All the association results were consistent with those in our main  
371 analysis. The above results showed the robustness of our main results.

372 Based on a comparison of exome-sequencing data of tumor tissue and tumor-adjacent  
373 normal tissue obtained from 150 TCGA PDAC patients, the somatic level changes of potentially  
374 functional variants/mutations were observed in at least one patient for 10 of the 39 genes encoding  
375 identified associated proteins (**Supplementary Table 4**). This proportion (10/39=25.64%) is  
376 significantly higher (enrichment *P* value < 0.00001) than the overall observed proportion of  
377 potentially functional changes across the genes encoding the proteins tested for association  
378 analyses (95/1,218 = 7.80%; here 1,218 represents the number of the genes available in TCGA  
379 analysis as part of the genes encoding the 1,389 assessed proteins).

380 According to the IPA analysis, several cancer-related functions were enriched for the  
381 genes encoding our identified proteins (**Supplementary Table 5**). The top canonical pathways  
382 identified included IL-15 production ( $P=2.21\times 10^{-3}$ ), Heparan Sulfate Biosynthesis (Late Stages)  
383 ( $P=2.97\times 10^{-3}$ ), Heparan Sulfate Biosynthesis ( $P=3.99\times 10^{-3}$ ), Sperm Motility ( $P=7.73\times 10^{-3}$ ), and  
384 Dermatan Sulfate Biosynthesis (Late Stages) ( $P=0.01$ ) (**Figure 3**). Among the related networks,  
385 the top network was cell-to-cell signaling and interaction, cardiovascular system development  
386 and function, organismal development (**Supplementary Figure 1**), followed by cancer,  
387 organismal injury and abnormalities, respiratory disease, free radical scavenging, cell death and  
388 survival, organismal injury and abnormalities, carbohydrate metabolism, small molecule  
389 biochemistry, cell cycle, and cancer, cell-to-cell signaling and interaction, cellular assembly and  
390 organization. Interactions among identified proteins were investigated based on STRING  
391 database (**Figure 3**). In the network, KDR was predicted to interact with IGF1R, NOTCH1,  
392 MET, SEMA6A, ENG, SELP, and SELE.

393 Based on interrogation using the OpenTargets and DrugBank database, ten of the  
394 identified proteins are supported to be relevant to PDAC (overall score  $>0$  in OpenTargets) and  
395 are targets of existing drugs approved to be used to treat human conditions (**Table 3**). Our work  
396 indicates potential drug repurposing opportunities of these drug targets to other indications. The  
397 scores of molecular docking between each of the proteins and the corresponding meta-drug  
398 agents were included in **Table 3**.

399 Among the 16 novel associated proteins, analysis of TGCA data also revealed potential  
400 relevance of B4GT1 and GOLM1 with tumor development (**Supplementary Figure 2 and 3**). The  
401 examination of *GOLM1* and *B4GALT1* gene expression in PADD cancer was conducted using  
402 GEPIA (Gene Expression Profiling Interactive Analysis). The analysis involved a dataset

403 consisting of 179 tumor samples and 171 normal controls. The box plot analysis revealed a  
404 statistically significant increase in *GOLM1* (Supplementary Figure 2A) and *B4GALT1*  
405 (Supplementary Figure 3A) expression in the tumor samples as compared with the normal  
406 control group. GEPIA, accessible through the following web link: <http://gepia.cancer-pku.cn/>,  
407 served as the platform for this investigation. The survival analysis of *GOLM1* and *B4GALT1* gene  
408 expression in PADD cancer was conducted using GEPIA. Survival plots revealed a significant  
409 decrease in overall survival (OS) and disease-free survival (DFS) among tumor samples exhibiting  
410 elevated *GOLM1* or *B4GALT1* expression (n=89) compared with those with low expression  
411 (n=89). Employing the Log-rank test for hypothesis testing, our findings emphasize a noteworthy  
412 correlation between heightened gene expression and reduced OS and DFS in the PADD cancer  
413 cohort (Supplementary Figure 2B, C, Supplementary Figure 3B, C). Consequently, these two  
414 proteins were selected as the targets for experimental validation to further investigate their  
415 potential roles in PDAC development. Two gene-specific siRNAs (siGOML1 and siB4GAL1)  
416 were employed for post-transcriptional gene silencing of *GOML1* and *B4GAL1*, resulting in the  
417 knockdown of these two genes. As depicted in **Figure 4A**, qPCR analysis demonstrated a  
418 significant reduction in the mRNA expression of *GOML1* and *B4GAL1* in PANC-1 and SU.86.86  
419 cells at 72 hours after transfection with siGOML1 or siB4GAL1 (40 nM) when compared with the  
420 untreated control group ( $P < 0.05$ ). No significant difference was observed between the negative  
421 control group (NC, Mock-siRNA transfection) and the control groups (**Figure 4A**). This trend was  
422 also consistent in the western blot analysis (**Figure 4B**) in comparison with the qPCR assay,  
423 indicating that siGOML1 and siB4GAL1 effectively reduce the expression of *GOML1* and  
424 *B4GAL1* at both mRNA and protein levels in PANC-1 and SU.86.86 cells.

425 To assess the biological impact of *GOLM1* and *B4GAL1* silencing in PANC-1 and

426 SU.86.86 cells, cell proliferation was examined using the MTS assay over a span of five  
427 consecutive days. As shown in **Figures 4C** and **4D**, transfection of siGOML1 and siB4GAL1  
428 inhibited cell proliferation in both PANC-1 and SU.86.86 cells compared with the control  
429 (untransfected) and NC (Mock-siRNA transfected) groups. Furthermore, a wound healing assay  
430 demonstrated that at 12- and 24-hours post-scratch treatment, the open wound area in *GOLM11*  
431 and *B4GAL1* siRNA-transfected cells was significantly larger than that in mock siRNA-transfected  
432 or untransfected cells (**Figure 4D, 4E**), implying that knockdown of *GOLM11* and *B4GAL1* in  
433 PANC-1 and SU.86.86 cells effectively inhibited cell migration *in vitro*. To investigate whether  
434 the down-regulation of *GOLM11* and *B4GAL1* affects the invasive capabilities of PANC-1 and  
435 SU.86.86 cells, a transwell analysis was performed. The results revealed a significant inhibition of  
436 cell invasion in PANC-1 and SU.86.86 cells upon *GOLM11* or *B4GAL1* silencing. The number of  
437 siGOML1 or siB4GAL1-transfected cells invading through the membrane was markedly lower  
438 than that of control-siRNA transfected cells (**Fig. 4F**,  $P < 0.05$ ). Together, our findings suggest  
439 that GOLM1 and B4GT1 play crucial roles in PDAC cell proliferation, migration, and invasion,  
440 and their suppression could potentially serve as a therapeutic strategy for PDAC.

441

## 442 **Discussion**

443 This is the first PWAS study using comprehensive protein genetic prediction models to  
444 assess the associations between genetically predicted circulating protein concentrations and  
445 PDAC risk. Overall, we identified 40 proteins that were significantly associated with PDAC risk  
446 after FDR correction, including 16 novel proteins that have not been previously reported. Our  
447 results suggest new knowledge on the genetics and etiology of PDAC, and the newly identified  
448 proteins could serve as candidate blood biomarkers for risk assessment of PDAC, a highly fatal

449 malignancy. We also identified potential drug repurposing opportunities targeting the identified  
450 proteins which warrant further investigations.

451         In previous studies, blood concentrations of specific proteins such as CA242, PIVKA-II,  
452 PAM4, S100A6, OPN, RBM6, EphA2, and OPG have been reported to be potentially associated  
453 with PDAC risk (4-7). In the INTERVAL dataset, proteins S100A6 and OPG were captured, and  
454 we were able to develop satisfactory prediction models for their levels in blood (17). We  
455 observed a significant association with the same direction for OPG ( $P$ -value = 0.03, Z-score =  
456 2.23) but not for S100A6 ( $P$ -value=0.93) with PDAC risk. Such inconsistent findings with  
457 previous studies might be explained by potential biases in previous epidemiological studies and  
458 warrant further exploration.

459         In this large study, we identified 16 novel proteins that were associated with PDAC risk.  
460 Previous studies have suggested potential roles for some of the novel proteins in pancreatic  
461 tumorigenesis. Tie1 deficiency is reported to induce endothelial–mesenchymal transition  
462 (EndMT) and promote a motile phenotype (43). EndMT is known to present in human pancreatic  
463 tumors (43). Another study reports that TNF- $\alpha$  that is abundantly present in PDAC, induces  
464 EndMT and acts at least partially through TIE1 regulation in murine pancreatic tumors (44). For  
465 CPB1, immunohistochemistry of tissue microarray from PDAC patients showed that it was  
466 significantly downregulated in pancreatic tumor compared with adjacent normal pancreatic  
467 tissues (45). This aligns with the negative association between genetically predicted levels of  
468 carboxypeptidase B1 and PDAC risk observed in this study. In another study it was reported that  
469 mutations in *CPBI* were associated with pancreatic cancer (46). Regarding GOLM1, one study  
470 supported that long non-coding RNA TP73-AS1 could promote pancreatic cancer progression  
471 through GOLM1 upregulation by competitively binding to miR-128-3p (47). Further

472 investigations are warranted to clarify roles of the identified proteins in pancreatic cancer  
473 development.

474         Based on drug repurposing analyses, we prioritized several drugs that may serve as  
475 promising candidates for treating PDAC, such as Crizotinib, Cabozantinib, Brigatinib,  
476 Capmatinib, Tepotinib, and Tivozanib targeting Met. Previous research has supported potential  
477 link between these drugs and PDAC. For example, earlier research found that Crizotinib and  
478 Cabozantinib could decrease PDAC cell line viability *in vitro* (48). Cabozantinib together with  
479 photodynamic therapy had been shown to achieve local control and decrease in tumor metastases  
480 in preclinical PDAC models (49). A translational mathematical modeling study revealed that  
481 Tepotinib at a dose selection of 500 mg once daily could be effective for PDAC (50). Further  
482 work is needed to assess potential efficacy of these drug candidates in PDAC treatment.

483         There are several strengths of this study for detecting proteins associated with PDAC  
484 risk. We developed comprehensive protein genetic prediction models as instruments, which not  
485 only potentially minimize biases commonly encountered in conventional observational study  
486 design, but also bring improved statistical power compared with the design of only using pQTLs  
487 as instruments. However, several limitations of this study need to be recognized when  
488 interpreting our findings. First, our results may still be susceptible to potential pleiotropic effects  
489 and may not necessarily infer causality. Similar to the design of transcriptome-wide association  
490 study (TWAS), our PWAS should be useful for prioritizing causal proteins; however we cannot  
491 completely exclude the possibility of false positive findings for some of the identified  
492 associations (51). Several likely reasons may induce these, such as correlated protein expression  
493 across participants, correlated genetically predicted protein expression, as well as shared genetic  
494 variants (51). Future functional investigation will better characterize whether the identified



495 proteins play a causal role in PDAC development. Second, since in this work the genetically  
496 regulated components of plasma protein levels were studied but not the overall measured levels,  
497 the utility of the identified proteins as risk biomarkers for PDAC remains unclear. Additional  
498 work for measuring circulating protein levels in pre-diagnostic blood samples are needed to  
499 evaluate the prediction role of these proteins in PDAC risk. Third, for our current model  
500 development design, the candidate predictors for each protein of interest merely rely on the  
501 potentially associated SNPs at a specific statistical threshold. A small proportion of proteins were  
502 excluded for downstream model construction because of the lack of such SNPs. Future work  
503 considering additional potential predictors beyond such statistics-based selection would be  
504 needed to improve the ability to evaluate additional proteins. Fourth, previous work has  
505 supported that covariates of smoking and body mass index are related to blood protein levels  
506 (52,53). In the current study using INTERVAL resources, we were not able to adjust for these  
507 covariates during model construction. Further study is thus needed to validate our results. Lastly,  
508 the current study largely focuses on Europeans for both protein genetic prediction model  
509 development and downstream association analyses with PDAC risk. Future research is warranted  
510 to study proteins associated with PDAC risk in other non-European ancestries.

511 Our TGCA data analysis has revealed potential relevance of B4GT1 and GOLM1 in  
512 tumorigenesis and tumor progression. B4GT1 (Beta-1,4-Galactosyl transferase 1) is an enzyme  
513 primarily responsible for catalyzing the galactose transfer to specific receptor molecules within  
514 organisms (54). Its significance lies in its involvement in various essential biological processes,  
515 such as intercellular communication and cell adhesion. Furthermore, alterations in the expression  
516 level of B4GT1 have been observed in certain cancers, suggesting its potential implication in tumor  
517 initiation and development (55). This intriguing finding has led us to select B4GT1 as a priority

518 target for further exploration of its role in PDAC using experimental techniques. Similarly, our  
519 attention was drawn to GOLM1 (Golgi Membrane Protein 1), a membrane protein predominantly  
520 located in the Golgi apparatus, which plays a pivotal role in cellular secretion and transport  
521 processes. Recent investigations have demonstrated an upregulation of GOLM1 expression in  
522 multiple cancer types, including liver cancer, lung cancer, and pancreatic cancer. Such evidence  
523 strongly suggests that GOLM1 might exert a significant influence on the onset and progression of  
524 these malignancies (56). Consequently, we selected GOLM1 as an additional focus for verification  
525 to gain deeper insights into its involvement in PDAC. By utilizing RNAi technology to silence  
526 these genes, our experimental results corroborated the critical roles of GOLM1 and B4GT1 in  
527 driving PDAC cell proliferation, migration, and invasion. Subduing these genes holds promise as  
528 a potential therapeutic approach for PDAC treatment.

529         In summary, using protein genetic prediction models, we identified 16 novel protein  
530 biomarker candidates for which the genetically predicted circulating levels were significantly  
531 associated with PDAC risk. Future work is needed to better characterize the potential roles of  
532 these proteins in the etiology of PDAC development, assess the predictive role of such markers  
533 in risk assessment of PDAC, and evaluate whether the potential drug repurposing opportunities  
534 we identified may improve PDAC outcomes.

### 535 **Data availability**

536 The pancreatic cancer genetic datasets used for the association analyses described in this  
537 manuscript can be obtained from dbGaP [57] (accession numbers phs000206.v5.p3 and  
538 phs000648.v1.p1). The INTERVAL individual-level genotype and protein data, and full  
539 summary association results from the genetic analysis, are available through the European  
540 Genotype Archive (accession number EGAS00001002555). Summary association results are

541 also publicly available at [58] <http://www.phpc.cam.ac.uk/ceu/proteins/>, through PhenoScanner  
542 [59] <http://www.phenoscaner.medschl.cam.ac.uk> and from the NHGRI-EBI GWAS Catalog  
543 [60]. Other data further supporting this work are openly available in the GigaScience repository,  
544 GigaDB [61].

545

546

**547 Abbreviations list:**

548 Pancreatic ductal adenocarcinoma (PDAC)

549 protein quantitative trait loci (pQTL)

550 Genome-wide association studies (GWAS)

551 the Pancreatic Cancer Cohort Consortium (PanScan)

552 the Pancreatic Cancer Case-Control Consortium (PanC4)

553 quality control (QC)

554 Hardy-Weinberg equilibrium (HWE)

555 false discovery rate (FDR)

556

**557 Competing interests**

558 L.W. provided consulting service to Pupil Bio Inc. and received honorarium. No potential  
559 conflicts of interest were disclosed by the other authors.

560

**561 Funding**

562 This study is supported by the University of Hawai'i Cancer Center and V Foundation V Scholar

563 Award. Lang Wu and Chong Wu are supported by NCI R01CA263494. Lang Wu is also

564 supported by NHGRI/NIMHD U54HG013243 and NCI R00CA218892. This work was

565 supported in part by NIH-NIMHD U54MD007598, NIH/NCI1U54CA14393, U56 CA101599-

566 01; Department-of-Defense Breast Cancer Research Program grant BC043180, NIH/NCATS

567 CTSI UL1TR000124 to J.V. Vadgama; Accelerating Excellence in Translational Science Pilot  
568 Grants G0812D05, NIH/NCI SC1CA200517 and 9 SC1 GM135050-05 to Y. Wu. Qizhi Yao is  
569 supported by VA Merit Award 1 I01 CX001822-01A2 (PI: Yao). The PanScan study was funded  
570 in whole or in part with federal funds from the National Cancer Institute (NCI), US National  
571 Institutes of Health (NIH) under contract number HHSN261200800001E. Additional support  
572 was received from NIH/NCI K07 CA140790, the American Society of Clinical Oncology  
573 Conquer Cancer Foundation, the Howard Hughes Medical Institute, the Lustgarten Foundation,  
574 the Robert T. and Judith B. Hale Fund for Pancreatic Cancer Research and Promises for Purple.  
575 A full list of acknowledgments for each participating study is provided in the Supplementary  
576 Note of the manuscript with PubMed ID: 25086665. For the PanC4 GWAS study, the patients  
577 and controls were derived from the following PANC4 studies: Johns Hopkins National Familial  
578 Pancreas Tumor Registry, Mayo Clinic Biospecimen Resource for Pancreas Research, Ontario  
579 Pancreas Cancer Study (OPCS), Yale University, MD Anderson Case Control Study,  
580 Queensland Pancreatic Cancer Study, University of California San Francisco Molecular  
581 Epidemiology of Pancreatic Cancer Study, International Agency of Cancer Research and  
582 Memorial Sloan Kettering Cancer Center. This work is supported by NCI R01CA154823  
583 Genotyping services were provided by the Center for Inherited Disease Research (CIDR). CIDR  
584 is fully funded through a federal contract from the National Institutes of Health to The Johns  
585 Hopkins University, contract number HHSN2682011000111. The content is solely the  
586 responsibility of the authors and does not necessarily represent the official views of the National  
587 Institutes of Health. Participants in the INTERVAL randomised controlled trial were recruited  
588 with the active collaboration of NHS Blood and Transplant England ([www.nhsbt.nhs.uk](http://www.nhsbt.nhs.uk)), which  
589 has supported field work and other elements of the trial. DNA extraction and genotyping were

590 co-funded by the National Institute for Health Research (NIHR), the NIHR BioResource  
591 (<http://bioresource.nihr.ac.uk>) and the NIHR Cambridge Biomedical Research Centre (BRC-  
592 1215-20014) [\*]. The academic coordinating centre for INTERVAL was supported by core  
593 funding from the: NIHR Blood and Transplant Research Unit in Donor Health and Genomics  
594 (NIHR BTRU-2014-10024), UK Medical Research Council (MR/L003120/1), British Heart  
595 Foundation (SP/09/002; RG/13/13/30194; RG/18/13/33946) and NIHR Cambridge BRC (BRC-  
596 1215-20014) [\*]. A complete list of the investigators and contributors to the INTERVAL trial is  
597 provided in reference [\*\*]. The academic coordinating centre would like to thank blood donor  
598 centre staff and blood donors for participating in the INTERVAL trial.

599

600 \*The views expressed are those of the author(s) and not necessarily those of the NIHR or the  
601 Department of Health and Social Care.

602

603 \*\*Di Angelantonio E, Thompson SG, Kaptoge SK, Moore C, Walker M, Armitage J, Ouwehand  
604 WH, Roberts DJ, Danesh J, INTERVAL Trial Group. Efficiency and safety of varying the  
605 frequency of whole blood donation (INTERVAL): a randomised trial of 45 000 donors. *Lancet*.  
606 2017 Nov 25;390(10110):2360-2371.

607

#### 608 **Author contributions**

609 L.W. conceived the study. Y.W. designed the functional experiments and supervised the *in vitro*  
610 functional work. C.W. and J.Z. contributed to the study design and/or prediction model building.  
611 S.L. performed model building and statistical analyses. D.H.G. contributed to statistical analyses.  
612 K.W. conducted *in vitro* functional work. J.Z. performed the drug repurposing curation. M.A.A.

613 performed molecular docking analysis. H.Z. and S. L. contributed to the bioinformatics and  
614 pathway analyses. L.W., J.Z., K.W., Y.W., A.M., H.Z., and T.Y. wrote the first version of  
615 manuscript. D.H.G., P.S., T.L., E.P., Q.Y., T.L., S.F., J.V.V., H-W. D., Y.D., H.Z., S.L., and  
616 A.B. contributed to manuscript revision and/or INTERVAL data management. All authors have  
617 reviewed and approved the final manuscript.

618

### 619 **Acknowledgements**

620 The authors also would like to thank all the individuals for their participation in the parent  
621 studies and all the researchers, clinicians, technicians and administrative staff for their  
622 contribution to the studies.

623

624

625

626

627

### 628 **Figure legends**

629 **Figure 1.** The overall design of this study.

630 **Figure 2.** Manhattan plot of 40 identified proteins associated with PDAC risk. Proteins with blue  
631 color represent those identified in our previous work using pQTL as instruments, and proteins with  
632 red color represent novel ones identified in the current study.

633 **Figure 3.** PPI network and canonical pathways of 40 identified proteins associated with PDAC  
634 risk. Network nodes represent proteins; edge thickness is proportional to the evidence for the PPI;

635 and dashed lines represent the interaction among clusters. The enrichment of canonical pathways  
636 was determined using IPA software.

637 **Figure 4.** The analysis of cell proliferation, migration and invasion on PANC-1 and SU.86.86  
638 cells with siB4GLAT1 and siGOLM1 transfection. The quantitative real-time PCR (qPCR) assay  
639 and the western blot assay (A) were used to investigate the RNAi effect of siB4GLAT1 and  
640 siGOLM1 (40 nM, 72 h) in PANC-1 and SU.86.86 cells. GAPDH were used as an internal  
641 control for qPCR analyses and western blot analyses, respectively (B,C) The effect of  
642 transfection with siB4GLAT1 and siGOLM1 (40 nM) on cell proliferation. The cells were  
643 detected by MTS [3-(4,5-dimethylthiazol-2-yl)-5-(3-carboxymethoxyphenyl)-2-(4-sulfophenyl)-  
644 2H-tetrazolium] assay on each day for 5 consecutive days. (D,E) Silencing of *B4GLAT1* and  
645 *GOLM1* inhibited migration of PANC-1 and SU.86.86 cells. Representative images of wound  
646 scratch assay performed to evaluate the motility of cells after silencing *B4GLAT1* and *GOLM1*.  
647 After transfection, a scratch was made on cells monolayer and was monitored with microscopy  
648 every 12 hours (0, 12, and 24 h). Bar graphs show normalized wound area, calculated using Gen  
649 5. Representative images of invasion assay. Data are represented as mean  $\pm$  SD from triplicate  
650 samples, where  $*p < 0.01$  compared to the control. (F) Effect of siB4GLAT1 and siGOLM1  
651 transfection on the invasion of PANC-1 and SU.86.86 cells. After siB4GLAT1 and siGOLM1  
652 transfection for 48 h, invasive ability of PANC-1 and SU.86.86 cells was identified by transwell  
653 assay.  $**P < 0.01$  compared with the control cells;  $##P < 0.01$  compared with the mock cells;  
654 data are expressed as the mean  $\pm$  SD, n = 3.

655

656

657



658

659

660

661

662

663

664 **References**

- 665 1. Sung H, Ferlay J, Siegel RL, Laversanne M, Soerjomataram I, Jemal A, *et al.* Global  
666 Cancer Statistics 2020: GLOBOCAN Estimates of Incidence and Mortality Worldwide  
667 for 36 Cancers in 185 Countries. *CA Cancer J Clin* **2021**;71(3):209-49 doi  
668 10.3322/caac.21660.
- 669 2. Rawla P, Sunkara T, Gaduputi V. Epidemiology of Pancreatic Cancer: Global Trends,  
670 Etiology and Risk Factors. *World J Oncol* **2019**;10(1):10-27 doi 10.14740/wjon1166.
- 671 3. Ballehaninna UK, Chamberlain RS. The clinical utility of serum CA 19-9 in the  
672 diagnosis, prognosis and management of pancreatic adenocarcinoma: An evidence based  
673 appraisal. *J Gastrointest Oncol* **2012**;3(2):105-19 doi 10.3978/j.issn.2078-6891.2011.021.
- 674 4. Tartaglione S, Pecorella I, Zarrillo SR, Granato T, Viggiani V, Manganaro L, *et al.*  
675 Protein Induced by Vitamin K Absence II (PIVKA-II) as a potential serological  
676 biomarker in pancreatic cancer: a pilot study. *Biochem Med (Zagreb)* **2019**;29(2):020707  
677 doi 10.11613/BM.2019.020707.
- 678 5. Duan B, Hu X, Fan M, Xiong X, Han L, Wang Z, *et al.* RNA-Binding Motif Protein 6 is  
679 a Candidate Serum Biomarker for Pancreatic Cancer. *Proteomics Clin Appl*  
680 **2019**;13(5):e1900048 doi 10.1002/prca.201900048.
- 681 6. Koshikawa N, Minegishi T, Kiyokawa H, Seiki M. Specific detection of soluble EphA2  
682 fragments in blood as a new biomarker for pancreatic cancer. *Cell Death Dis*  
683 **2017**;8(10):e3134 doi 10.1038/cddis.2017.545.
- 684 7. Loosen SH, Neumann UP, Trautwein C, Roderburg C, Luedde T. Current and future  
685 biomarkers for pancreatic adenocarcinoma. *Tumour Biol* **2017**;39(6):1010428317692231  
686 doi 10.1177/1010428317692231.
- 687 8. Didelez V, Sheehan N. Mendelian randomization as an instrumental variable approach to  
688 causal inference. *Stat Methods Med Res* **2007**;16(4):309-30 doi  
689 10.1177/0962280206077743.
- 690 9. Lawlor DA, Harbord RM, Sterne JA, Timpson N, Davey Smith G. Mendelian  
691 randomization: using genes as instruments for making causal inferences in epidemiology.  
692 *Stat Med* **2008**;27(8):1133-63 doi 10.1002/sim.3034.

- 693 10. Sun BB, Maranville JC, Peters JE, Stacey D, Staley JR, Blackshaw J, *et al.* Genomic atlas  
694 of the human plasma proteome. *Nature* **2018**;558(7708):73-9 doi 10.1038/s41586-018-  
695 0175-2.
- 696 11. Wu L, Shu X, Bao J, Guo X, Kote-Jarai Z, Haiman CA, *et al.* Analysis of Over 140,000  
697 European Descendants Identifies Genetically Predicted Blood Protein Biomarkers  
698 Associated with Prostate Cancer Risk. *Cancer Res* **2019**;79(18):4592-8 doi  
699 10.1158/0008-5472.CAN-18-3997.
- 700 12. Zhu J, Wu C, Wu L. Associations Between Genetically Predicted Protein Levels and  
701 COVID-19 Severity. *J Infect Dis* **2021**;223(1):19-22 doi 10.1093/infdis/jiaa660.
- 702 13. Zhu J, O'Mara TA, Liu D, Setiawan VW, Glubb D, Spurdle AB, *et al.* Associations  
703 between Genetically Predicted Circulating Protein Concentrations and Endometrial  
704 Cancer Risk. *Cancers (Basel)* **2021**;13(9) doi 10.3390/cancers13092088.
- 705 14. Shu X, Bao J, Wu L, Long J, Shu XO, Guo X, *et al.* Evaluation of associations between  
706 genetically predicted circulating protein biomarkers and breast cancer risk. *Int J Cancer*  
707 **2020**;146(8):2130-8 doi 10.1002/ijc.32542.
- 708 15. Gusev A, Ko A, Shi H, Bhatia G, Chung W, Penninx BW, *et al.* Integrative approaches  
709 for large-scale transcriptome-wide association studies. *Nat Genet* **2016**;48(3):245-52 doi  
710 10.1038/ng.3506.
- 711 16. Wu L, Yang Y, Guo X, Shu XO, Cai Q, Shu X, *et al.* An integrative multi-omics analysis  
712 to identify candidate DNA methylation biomarkers related to prostate cancer risk. *Nat*  
713 *Commun* **2020**;11(1):3905 doi 10.1038/s41467-020-17673-9.
- 714 17. Liu D, Zhou D, Sun Y, Zhu J, Ghoneim D, Wu C, *et al.* A Transcriptome-Wide  
715 Association Study Identifies Candidate Susceptibility Genes for Pancreatic Cancer Risk.  
716 *Cancer Res* **2020**;80(20):4346-54 doi 10.1158/0008-5472.CAN-20-1353.
- 717 18. Sun Y, Zhu J, Zhou D, Canchi S, Wu C, Cox NJ, *et al.* A transcriptome-wide association  
718 study of Alzheimer's disease using prediction models of relevant tissues identifies novel  
719 candidate susceptibility genes. *Genome Med* **2021**;13(1):141 doi 10.1186/s13073-021-  
720 00959-y.
- 721 19. Sun Y, Zhou D, Rahman MR, Zhu J, Ghoneim D, Cox NJ, *et al.* A transcriptome-wide  
722 association study identifies novel blood-based gene biomarker candidates for Alzheimer's  
723 disease risk. *Hum Mol Genet* **2021**;31(2):289-99 doi 10.1093/hmg/ddab229.
- 724 20. Zhu J, Yang Y, Kisiel JB, Mahoney DW, Michaud DS, Guo X, *et al.* Integrating Genome  
725 and Methylome Data to Identify Candidate DNA Methylation Biomarkers for Pancreatic  
726 Cancer Risk. *Cancer Epidemiol Biomarkers Prev* **2021**;30(11):2079-87 doi  
727 10.1158/1055-9965.EPI-21-0400.
- 728 21. Liu D, Zhu J, Zhou D, Nikas EG, Mitanis NT, Sun Y, *et al.* A transcriptome-wide  
729 association study identifies novel candidate susceptibility genes for prostate cancer risk.  
730 *Int J Cancer* **2022**;150(1):80-90 doi 10.1002/ijc.33808.
- 731 22. Sun Y, Bae YE, Zhu J, Zhang Z, Zhong H, Yu J, *et al.* A splicing transcriptome-wide  
732 association study identifies novel altered splicing for Alzheimer's disease susceptibility.  
733 *Neurobiol Dis* **2023**;184:106209 doi 10.1016/j.nbd.2023.106209.
- 734 23. Sun Y, Bae YE, Zhu J, Zhang Z, Zhong H, Cheng C, *et al.* A Splicing Transcriptome-  
735 Wide Association Study Identifies Candidate Altered Splicing for Prostate Cancer Risk.  
736 *OMICS* **2023**;27(8):372-80 doi 10.1089/omi.2023.0065.
- 737 24. Sun Y, Zhu J, Yang Y, Zhang Z, Zhong H, Zeng G, *et al.* Identification of candidate  
738 DNA methylation biomarkers related to Alzheimer's disease risk by integrating genome

- 739 and blood methylome data. *Transl Psychiatry* **2023**;13(1):387 doi 10.1038/s41398-023-  
740 02695-w.
- 741 25. Liu D, Bae YE, Zhu J, Zhang Z, Sun Y, Deng Y, *et al.* Splicing transcriptome-wide  
742 association study to identify splicing events for pancreatic cancer risk. *Carcinogenesis*  
743 **2023**;44(10-11):741-7 doi 10.1093/carcin/bgad069.
- 744 26. Liu S, Zhong H, Zhu J, Wu Y, Deng Y, Wu L. Regulome-wide association study  
745 identifies genetically driven accessible regions associated with pancreatic cancer risk. *Int*  
746 *J Cancer* **2024**;154(4):670-8 doi 10.1002/ijc.34761.
- 747 27. Liu S, Zhong H, Zhu J, Wu L. Identification of blood metabolites associated with risk of  
748 Alzheimer's disease by integrating genomics and metabolomics data. *Mol Psychiatry*  
749 **2024** doi 10.1038/s41380-023-02400-9.
- 750 28. Zhu J, Liu S, Walker KA, Zhong H, Ghoneim DH, Zhang Z, *et al.* Associations between  
751 genetically predicted plasma protein levels and Alzheimer's disease risk: a study using  
752 genetic prediction models. *Alzheimers Res Ther* **2024**;16(1):8 doi 10.1186/s13195-023-  
753 01378-4.
- 754 29. Zhong H, Liu S, Zhu J, Wu L. Associations between genetically predicted levels of blood  
755 metabolites and pancreatic cancer risk. *Int J Cancer* **2023**;153(1):103-10 doi  
756 10.1002/ijc.34466.
- 757 30. Zhong H, Zhu J, Liu S, Ghoneim DH, Surendran P, Liu T, *et al.* Identification of blood  
758 protein biomarkers associated with prostate cancer risk using genetic prediction models:  
759 analysis of over 140,000 subjects. *Hum Mol Genet* **2023**;32(22):3181-93 doi  
760 10.1093/hmg/ddad139.
- 761 31. Yang J, Lee SH, Goddard ME, Visscher PM. GCTA: a tool for genome-wide complex  
762 trait analysis. *Am J Hum Genet* **2011**;88(1):76-82 doi 10.1016/j.ajhg.2010.11.011.
- 763 32. Klein AP, Wolpin BM, Risch HA, Stolzenberg-Solomon RZ, Mucci E, Zhang M, *et al.*  
764 Genome-wide meta-analysis identifies five new susceptibility loci for pancreatic cancer.  
765 *Nat Commun* **2018**;9(1):556 doi 10.1038/s41467-018-02942-5.
- 766 33. McCarthy S, Das S, Kretzschmar W, Delaneau O, Wood AR, Teumer A, *et al.* A  
767 reference panel of 64,976 haplotypes for genotype imputation. *Nat Genet*  
768 **2016**;48(10):1279-83 doi 10.1038/ng.3643.
- 769 34. Howie BN, Donnelly P, Marchini J. A flexible and accurate genotype imputation method  
770 for the next generation of genome-wide association studies. *PLoS Genet*  
771 **2009**;5(6):e1000529 doi 10.1371/journal.pgen.1000529.
- 772 35. Kramer A, Green J, Pollard J, Jr., Tugendreich S. Causal analysis approaches in  
773 Ingenuity Pathway Analysis. *Bioinformatics* **2014**;30(4):523-30 doi  
774 10.1093/bioinformatics/btt703.
- 775 36. Szklarczyk D, Gable AL, Nastou KC, Lyon D, Kirsch R, Pyysalo S, *et al.* The STRING  
776 database in 2021: customizable protein-protein networks, and functional characterization  
777 of user-uploaded gene/measurement sets. *Nucleic Acids Res* **2021**;49(D1):D605-D12 doi  
778 10.1093/nar/gkaa1074.
- 779 37. Koscielny G, An P, Carvalho-Silva D, Cham JA, Fumis L, Gasparyan R, *et al.* Open  
780 Targets: a platform for therapeutic target identification and validation. *Nucleic Acids Res*  
781 **2017**;45(D1):D985-D94 doi 10.1093/nar/gkw1055.
- 782 38. Wishart DS, Knox C, Guo AC, Shrivastava S, Hassanali M, Stothard P, *et al.* DrugBank:  
783 a comprehensive resource for in silico drug discovery and exploration. *Nucleic Acids Res*  
784 **2006**;34(Database issue):D668-72 doi 10.1093/nar/gkj067.

- 785 39. Alam MA SH, Deng H-W. A robust kernel machine regression towards biomarker  
786 selection in multi-omics datasets of osteoporosis for drug discovery. In: University T,  
787 editor. arXiv2022.
- 788 40. Kim S, Chen J, Cheng T, Gindulyte A, He J, He S, *et al.* PubChem 2019 update:  
789 improved access to chemical data. *Nucleic Acids Res* **2019**;47(D1):D1102-D9 doi  
790 10.1093/nar/gky1033.
- 791 41. Kim SY, Jeong HH, Kim J, Moon JH, Sohn KA. Robust pathway-based multi-omics data  
792 integration using directed random walks for survival prediction in multiple cancer  
793 studies. *Biol Direct* **2019**;14(1):8 doi 10.1186/s13062-019-0239-8.
- 794 42. Zhu J, Shu X, Guo X, Liu D, Bao J, Milne RL, *et al.* Associations between Genetically  
795 Predicted Blood Protein Biomarkers and Pancreatic Cancer Risk. *Cancer Epidemiol*  
796 *Biomarkers Prev* **2020**;29(7):1501-8 doi 10.1158/1055-9965.EPI-20-0091.
- 797 43. Garcia J, Sandi MJ, Cordelier P, Binetruy B, Pouyssegur J, Iovanna JL, *et al.* Tiel  
798 deficiency induces endothelial-mesenchymal transition. *EMBO Rep* **2012**;13(5):431-9  
799 doi 10.1038/embor.2012.29.
- 800 44. Adjuto-Saccone M, Soubeyran P, Garcia J, Audebert S, Camoin L, Rubis M, *et al.* TNF-  
801 alpha induces endothelial-mesenchymal transition promoting stromal development of  
802 pancreatic adenocarcinoma. *Cell Death Dis* **2021**;12(7):649 doi 10.1038/s41419-021-  
803 03920-4.
- 804 45. Song Y, Wang Q, Wang D, Junqiang L, Yang J, Li H, *et al.* Label-Free Quantitative  
805 Proteomics Unravels Carboxypeptidases as the Novel Biomarker in Pancreatic Ductal  
806 Adenocarcinoma. *Transl Oncol* **2018**;11(3):691-9 doi 10.1016/j.tranon.2018.03.005.
- 807 46. Tamura K, Yu J, Hata T, Suenaga M, Shindo K, Abe T, *et al.* Mutations in the pancreatic  
808 secretory enzymes CPA1 and CPB1 are associated with pancreatic cancer. *Proc Natl*  
809 *Acad Sci U S A* **2018**;115(18):4767-72 doi 10.1073/pnas.1720588115.
- 810 47. Wang B, Sun X, Huang KJ, Zhou LS, Qiu ZJ. Long non-coding RNA TP73-AS1  
811 promotes pancreatic cancer growth and metastasis through miRNA-128-3p/GOLM1 axis.  
812 *World J Gastroenterol* **2021**;27(17):1993-2014 doi 10.3748/wjg.v27.i17.1993.
- 813 48. Escorcía FE, Houghton JL, Abdel-Atti D, Pereira PR, Cho A, Gutsche NT, *et al.*  
814 ImmunoPET Predicts Response to Met-targeted Radioligand Therapy in Models of  
815 Pancreatic Cancer Resistant to Met Kinase Inhibitors. *Theranostics* **2020**;10(1):151-65  
816 doi 10.7150/thno.37098.
- 817 49. Broekgaarden M, Alkhateeb A, Bano S, Bulin AL, Obaid G, Rizvi I, *et al.* Cabozantinib  
818 Inhibits Photodynamic Therapy-Induced Auto- and Paracrine MET Signaling in  
819 Heterotypic Pancreatic Microtumors. *Cancers (Basel)* **2020**;12(6) doi  
820 10.3390/cancers12061401.
- 821 50. Xiong W, Friese-Hamim M, Johne A, Stroh C, Klevesath M, Falchook GS, *et al.*  
822 Translational pharmacokinetic-pharmacodynamic modeling of preclinical and clinical  
823 data of the oral MET inhibitor tepotinib to determine the recommended phase II dose.  
824 *CPT Pharmacometrics Syst Pharmacol* **2021**;10(5):428-40 doi 10.1002/psp4.12602.
- 825 51. Wainberg M, Sinnott-Armstrong N, Mancuso N, Barbeira AN, Knowles DA, Golan D, *et*  
826 *al.* Opportunities and challenges for transcriptome-wide association studies. *Nature*  
827 *genetics* **2019**;51(4):592-9.
- 828 52. Madhuvanathi M, Lathadevi GV. Serum Proteins Alteration in Association with Body  
829 Mass Index in Human Volunteers. *J Clin Diagn Res* **2016**;10(6):CC05-7 doi  
830 10.7860/JCDR/2016/18278.8047.

- 831 53. Gallus S, Lugo A, Suatoni P, Taverna F, Bertocchi E, Boffi R, *et al.* Effect of Tobacco  
832 Smoking Cessation on C-Reactive Protein Levels in A Cohort of Low-Dose Computed  
833 Tomography Screening Participants. *Sci Rep* **2018**;8(1):12908 doi 10.1038/s41598-018-  
834 29867-9.
- 835 54. Morokuma D, Xu J, Hino M, Mon H, Merzaban JS, Takahashi M, *et al.* Expression and  
836 Characterization of Human beta-1, 4-Galactosyltransferase 1 (beta4GalT1) Using  
837 Silkworm-Baculovirus Expression System. *Mol Biotechnol* **2017**;59(4-5):151-8 doi  
838 10.1007/s12033-017-0003-1.
- 839 55. Cui Y, Li J, Zhang P, Yin D, Wang Z, Dai J, *et al.* B4GALT1 promotes immune escape  
840 by regulating the expression of PD-L1 at multiple levels in lung adenocarcinoma. *J Exp*  
841 *Clin Cancer Res* **2023**;42(1):146 doi 10.1186/s13046-023-02711-3.
- 842 56. Liu Y, Hu X, Liu S, Zhou S, Chen Z, Jin H. Golgi Phosphoprotein 73: The Driver of  
843 Epithelial-Mesenchymal Transition in Cancer. *Front Oncol* **2021**;11:783860 doi  
844 10.3389/fonc.2021.783860.
- 845 57. dbGAP: <https://www.ncbi.nlm.nih.gov/gap/>, Accessed on 1 March 2024.
- 846 58. <http://www.phpc.cam.ac.uk/ceu/proteins/>, Accessed 15 February 2024.
- 847 59. PhenoScanner: <http://www.phenoscanter.medschl.cam.ac.uk>), Accessed 5 March 2024
- 848 60. NHGRI-EBI GWAS Catalog: <https://www.ebi.ac.uk/gwas/downloads/summary-statistics>,  
849 Accessed 10 February 2024.
- 850 61. Zhu J; Wu K; Liu S; Masca A; Zhong H; Yang T; Ghoneim DH; Surendran P; Liu T;  
851 Yao Q; Liu T; Fahle S; Butterworth A; Alam MA; Vadgama JV; Deng Y; Deng H; Wu  
852 C; Wu Y; Wu L: Supporting data for "Proteome-wide association study and functional  
853 validation identify novel protein markers for pancreatic ductal adenocarcinoma"  
854 GigaScience Database. 2024. <http://dx.doi.org/10.5524/102502>

855

**Table 1.** Novel proteins with genetically predicted concentrations in plasma to be associated with pancreatic cancer risk

| Protein             | SOMAmer ID         | Protein full name                                                   | Protein-encoding gene | Region for protein encoding gene | Prediction model method | Heritability | Number of Predicting SNPs | Number of Predicting SNPs-Cis* | Number of Predicting SNPs-Trans | Model internal cross validation R <sup>2</sup> | Model external validation R <sup>2</sup> | Z-value <sup>a</sup> | P-value <sup>a</sup>   | FDR P-value <sup>b</sup> |
|---------------------|--------------------|---------------------------------------------------------------------|-----------------------|----------------------------------|-------------------------|--------------|---------------------------|--------------------------------|---------------------------------|------------------------------------------------|------------------------------------------|----------------------|------------------------|--------------------------|
| IL-23 R             | IL23R.5088.175.3   | Interleukin-23 receptor                                             | <i>IL23R</i>          | 1p31.3                           | elastic net             | <u>0.06</u>  | 24                        | 24                             | 0                               | 0.04                                           | 0.04                                     | 3.55                 | 3.80×10 <sup>-4</sup>  | 0.02                     |
| sTie-1              | TIE1.2844.53.2     | Tyrosine-Protein Kinase Receptor Tie-1, Soluble                     | <i>TIE1</i>           | 1p34.2                           | lasso                   | <u>0.2</u>   | 18                        | 7                              | 11                              | 0.22                                           | 0.28                                     | 5.67                 | 1.46×10 <sup>-8</sup>  | 1.22×10 <sup>-6</sup>    |
| FA20B               | FAM20B.7198.197.3  | Glycosaminoglycan Xylosylkinase                                     | <i>FAM20B</i>         | 1q25.2                           | lasso                   | <u>0.05</u>  | 8                         | 5                              | 3                               | 0.02                                           | 0.04                                     | 5.30                 | 1.17×10 <sup>-7</sup>  | 7.82×10 <sup>-6</sup>    |
| FAM3D               | FAM3D.13102.1.3    | Protein FAM3D                                                       | <i>FAM3D</i>          | 3p14.2                           | elastic net             | <u>0.27</u>  | 58                        | 16                             | 42                              | 0.37                                           | 0.36                                     | 6.10                 | 1.07×10 <sup>-9</sup>  | 1.02×10 <sup>-7</sup>    |
| Carboxypeptidase B1 | CPB1.6356.3.3      | Carboxypeptidase B                                                  | <i>CPB1</i>           | 3q24                             | lasso                   | <u>0.07</u>  | 7                         | 3                              | 4                               | 0.04                                           | 0.03                                     | -4.55                | 5.38×10 <sup>-6</sup>  | 3.00×10 <sup>-4</sup>    |
| RAP                 | LRPAP1.3640.14.3   | alpha-2-macroglobulin receptor-associated protein                   | <i>LRPAP1</i>         | 4p16.3                           | elastic net             | <u>0.47</u>  | 168                       | 23                             | 145                             | 0.27                                           | 0.22                                     | 3.21                 | 0.001                  | 0.04                     |
| Semaphorin-6A       | SEMA6A.7945.10.3   | Semaphorin-6A                                                       | <i>SEMA6A</i>         | 5q23.1                           | elastic net             | <u>0.11</u>  | 66                        | 44                             | 22                              | 0.05                                           | 0.05                                     | -3.57                | 3.54×10 <sup>-4</sup>  | 0.02                     |
| B4GT1               | B4GALT1.13381.49.3 | Beta-1,4-galactosyltransferase 1                                    | <i>B4GALT1</i>        | 9p21.1                           | elastic net             | <u>0.10</u>  | 39                        | 16                             | 23                              | 0.08                                           | 0.10                                     | 4.65                 | 3.29×10 <sup>-6</sup>  | 1.96×10 <sup>-4</sup>    |
| GOLM1               | GOLM1.8983.7.3     | Golgi Membrane Protein 1                                            | <i>GOLM1</i>          | 9q21.33                          | lasso                   | <u>0.11</u>  | 10                        | 0                              | 10                              | 0.14                                           | 0.17                                     | 8.07                 | 7.12×10 <sup>-16</sup> | 2.14×10 <sup>-13</sup>   |
| QSOX2               | QSOX2.8397.147.3   | Sulfhydryl oxidase 2                                                | <i>QSOX2</i>          | 9q34.3                           | elastic net             | <u>0.31</u>  | 28                        | 10                             | 18                              | 0.40                                           | 0.40                                     | 7.98                 | 1.44×10 <sup>-15</sup> | 2.75×10 <sup>-13</sup>   |
| KIN17               | KIN.14643.27.3     | DNA/RNA-binding protein KIN17                                       | <i>KIN</i>            | 10p14                            | elastic net             | <u>0.08</u>  | 29                        | 0                              | 29                              | 0.05                                           | 0.07                                     | -5.52                | 3.31×10 <sup>-8</sup>  | 2.60×10 <sup>-6</sup>    |
| ISLR2               | ISLR2.13124.20.3   | Immunoglobulin superfamily containing leucine-rich repeat protein 2 | <i>ISLR2</i>          | 15q24.1                          | elastic net             | <u>0.17</u>  | 77                        | 32                             | 45                              | 0.14                                           | 0.13                                     | -3.45                | 5.65×10 <sup>-4</sup>  | 0.02                     |
| DPEP2               | DPEP2.8327.26.3    | Dipeptidase 2                                                       | <i>DPEP2</i>          | 16q22.1                          | elastic net             | <u>0.07</u>  | 36                        | 0                              | 36                              | 0.06                                           | 0.05                                     | -4.01                | 5.97×10 <sup>-5</sup>  | 0.003                    |
| Chymotrypsin        | CTRB1.5671.1.3     | Chymotrypsinogen B                                                  | <i>CTRB1</i>          | 16q23.1                          | elastic net             | <u>0.35</u>  | 85                        | 69                             | 16                              | 0.23                                           | 0.24                                     | -4.32                | 1.59×10 <sup>-5</sup>  | 8.50×10 <sup>-4</sup>    |

|         |                                 |                                        |                                                |                                |             |             |    |    |    |      |      |      |                       |                       |
|---------|---------------------------------|----------------------------------------|------------------------------------------------|--------------------------------|-------------|-------------|----|----|----|------|------|------|-----------------------|-----------------------|
| Laminin | LAMA1.LAMB1.LAMC1.<br>2728.62.2 | Laminin                                | <i>LAMA1,</i><br><i>LAMB1,</i><br><i>LAMC1</i> | 18p11.31,<br>7q31.1,<br>1q25.3 | elastic net | <u>0.09</u> | 62 | 14 | 48 | 0.08 | 0.05 | 3.88 | 1.06×10 <sup>-4</sup> | 0.005                 |
| TPST2   | TPST2.8024.64.3                 | Protein-Tyrosine<br>Sulfotransferase 2 | <i>TPST2</i>                                   | 22q12.1                        | elastic net | <u>0.08</u> | 52 | 28 | 24 | 0.07 | 0.08 | 5.88 | 4.16×10 <sup>-9</sup> | 3.71×10 <sup>-7</sup> |

\* SNPs within 1MB of the protein-encoding gene

a Associations between genetically predicted protein levels and PDAC risk after adjustment for age, sex, and top 10 principle components.

b FDR *P*-value: false discovery rate (FDR) adjusted *P*-value; associations with a FDR  $p \leq 0.05$  considered statistically significant

**Table 2.** Previously reported proteins with genetically predicted concentrations in plasma to be associated with pancreatic cancer risk

| Protein                         | SOMAmer ID       | Protein full name                             | Protein-encoding gene | Region for protein encoding gene | Prediction model method | Heritability         | Number of Predicting SNPs | Number of Predicting SNPs-Cis* | Number of Predicting SNPs-Trans | Model internal cross validation R <sup>2</sup> | Model external validation R <sup>2</sup> | Z-value <sup>a</sup> | P-value <sup>a</sup>   | FDR P-value <sup>b</sup> |
|---------------------------------|------------------|-----------------------------------------------|-----------------------|----------------------------------|-------------------------|----------------------|---------------------------|--------------------------------|---------------------------------|------------------------------------------------|------------------------------------------|----------------------|------------------------|--------------------------|
| sE-Selectin                     | SELE.3470.1.2    | E-selectin                                    | <i>SELE</i>           | 1q24.2                           | lasso                   | <a href="#">0.30</a> | 6                         | 0                              | 6                               | 0.39                                           | 0.44                                     | -7.88                | 3.33×10 <sup>-15</sup> | 5.47×10 <sup>-13</sup>   |
| P-Selectin                      | SELP.4154.57.2   | P-Selectin                                    | <i>SELP</i>           | 1q24.2                           | lasso                   | <a href="#">0.33</a> | 11                        | 7                              | 4                               | 0.26                                           | 0.27                                     | -3.77                | 1.66×10 <sup>-4</sup>  | 0.008                    |
| LMA2L                           | LMAN2L.8013.9.3  | VIP36-like protein                            | <i>LMAN2L</i>         | 2q11.2                           | top1                    | <a href="#">0.04</a> | 1                         | 1                              | 0                               | 0.03                                           | 0.02                                     | 3.35                 | 8.01×10 <sup>-4</sup>  | 0.03                     |
| Alkaline phosphatase, intestine | ALPI.10463.23.3  | Intestinal-type alkaline phosphatase          | <i>ALPI</i>           | 2q37.1                           | lasso                   | <a href="#">0.03</a> | 8                         | 0                              | 8                               | 0.03                                           | 0.06                                     | -6.79                | 1.09×10 <sup>-11</sup> | 1.21×10 <sup>-9</sup>    |
| VEGF sR2                        | KDR.3651.50.5    | Vascular endothelial growth factor receptor 2 | <i>KDR</i>            | 4q12                             | elastic net             | <a href="#">0.29</a> | 56                        | 18                             | 38                              | 0.18                                           | 0.12                                     | -6.21                | 5.22×10 <sup>-10</sup> | 5.37×10 <sup>-8</sup>    |
| ADH1B                           | ADH1B.9834.62.3  | Alcohol dehydrogenase 1B                      | <i>ADH1B</i>          | 4q23                             | lasso                   | <a href="#">0.12</a> | 6                         | 0                              | 6                               | 0.08                                           | 0.03                                     | 3.21                 | 0.001                  | 0.04                     |
| LIF sR                          | LIFR.5837.49.3   | Leukemia inhibitory factor receptor           | <i>LIFR</i>           | 5p13.1                           | top1                    | <a href="#">0.04</a> | 1                         | 0                              | 1                               | 0.03                                           | 0.02                                     | -7.39                | 1.42×10 <sup>-13</sup> | 1.73×10 <sup>-11</sup>   |
| gp130, soluble                  | IL6ST.2620.4.2   | Interleukin-6 receptor subunit beta           | <i>IL6ST</i>          | 5q11.2                           | elastic net             | <a href="#">0.08</a> | 51                        | 21                             | 30                              | 0.06                                           | 0.05                                     | -3.69                | 2.22×10 <sup>-4</sup>  | 0.01                     |
| GP116                           | ADGRF5.6409.57.3 | Adhesion G protein-coupled receptor F5        | <i>ADGRF5</i>         | 6p12.3                           | lasso                   | <a href="#">0.42</a> | 22                        | 15                             | 7                               | 0.46                                           | 0.43                                     | -4.65                | 3.37×10 <sup>-6</sup>  | 1.96×10 <sup>-4</sup>    |
| CD36 ANTIGEN                    | CD36.2973.15.2   | Platelet glycoprotein 4                       | <i>CD36</i>           | 7q21.11                          | top1                    | <a href="#">0.04</a> | 1                         | 0                              | 1                               | 0.03                                           | 0.05                                     | 3.31                 | 9.25×10 <sup>-4</sup>  | 0.03                     |
| Met                             | MET.2837.3.2     | Hepatocyte growth factor receptor             | <i>MET</i>            | 7q31                             | blup                    | <a href="#">0.09</a> | 1,668                     | 603                            | 1,065                           | 0.07                                           | 0.04                                     | -5.06                | 4.27×10 <sup>-7</sup>  | 2.72×10 <sup>-5</sup>    |
| STOM                            | STOM.8261.51.3   | Erythrocyte band 7 integral membrane protein  | <i>STOM</i>           | 9q33.2                           | lasso                   | <a href="#">0.10</a> | 5                         | 0                              | 5                               | 0.11                                           | 0.05                                     | 3.31                 | 9.18×10 <sup>-4</sup>  | 0.03                     |
| BGAT                            | ABO.9253.52.3    | Histo-blood group ABO system transferase      | <i>ABO</i>            | 9q34.2                           | blup                    | <a href="#">0.55</a> | 2,473                     | 2,347                          | 126                             | 0.72                                           | 0.72                                     | 9.18                 | 4.20×10 <sup>-20</sup> | 5.62×10 <sup>-17</sup>   |
| Notch 1                         | NOTCH1.5107.7.2  | Neurogenic locus notch homolog protein 1      | <i>NOTCH1</i>         | 9q34.3                           | top1                    | <a href="#">0.02</a> | 1                         | 0                              | 1                               | 0.01                                           | 0.02                                     | 3.29                 | 9.97×10 <sup>-4</sup>  | 0.04                     |



|              |                   |                                                   |               |          |             |             |    |    |    |      |      |       |                        |                        |
|--------------|-------------------|---------------------------------------------------|---------------|----------|-------------|-------------|----|----|----|------|------|-------|------------------------|------------------------|
| Endoglin     | ENG.4908.6.1      | Endoglin                                          | <i>ENG</i>    | 9q34.11  | top1        | <u>0.02</u> | 1  | 0  | 1  | 0.01 | 0.01 | -8.04 | $8.93 \times 10^{-16}$ | $2.14 \times 10^{-13}$ |
| ST4S6        | CHST15.4469.78.2  | Carbohydrate sulfotransferase 15                  | <i>CHST15</i> | 10q26.13 | lasso       | <u>0.05</u> | 5  | 1  | 4  | 0.05 | 0.03 | -8.62 | $6.46 \times 10^{-18}$ | $4.32 \times 10^{-15}$ |
|              | CHST15.14097.86.3 |                                                   |               |          | lasso       | <u>0.06</u> | 9  | 2  | 7  | 0.04 | 0.02 | -8.03 | $9.60 \times 10^{-16}$ | $2.14 \times 10^{-13}$ |
| CHSTB        | CHST11.7779.86.3  | Carbohydrate sulfotransferase 11                  | <i>CHST11</i> | 12q23.3  | elastic net | <u>0.15</u> | 69 | 46 | 23 | 0.11 | 0.07 | 3.52  | $4.25 \times 10^{-4}$  | 0.02                   |
| THSD1        | THSD1.5621.64.3   | Thrombospondin type-1 domain-containing protein 1 | <i>THSD1</i>  | 13q14.3  | elastic net | <u>0.07</u> | 44 | 27 | 17 | 0.04 | 0.03 | -5.34 | $9.41 \times 10^{-8}$  | $6.62 \times 10^{-6}$  |
| GLCE         | GLCE.7808.5.3     | D-glucuronyl C5-epimerase                         | <i>GLCE</i>   | 15q23    | lasso       | <u>0.27</u> | 11 | 6  | 5  | 0.36 | 0.34 | 4.18  | $2.94 \times 10^{-5}$  | 0.002                  |
| IGF-1 sR     | IGF1R.4232.19.2   | Insulin-like growth factor 1 receptor             | <i>IGF1R</i>  | 15q26.3  | top1        | <u>0.01</u> | 1  | 0  | 1  | 0.01 | 0.02 | -7.39 | $1.42 \times 10^{-13}$ | $1.73 \times 10^{-11}$ |
| Desmoglein-2 | DSG2.9484.75.3    | Desmoglein-2                                      | <i>DSG2</i>   | 18q12.1  | elastic net | <u>0.06</u> | 66 | 44 | 22 | 0.04 | 0.06 | 5.34  | $9.18 \times 10^{-8}$  | $6.62 \times 10^{-6}$  |
| DC-SIGN      | CD209.3029.52.2   | CD209 Antigen                                     | <i>CD209</i>  | 19p13.2  | elastic net | <u>0.30</u> | 58 | 26 | 32 | 0.39 | 0.38 | 8.52  | $1.62 \times 10^{-17}$ | $7.22 \times 10^{-15}$ |
| IR           | INSR.3448.13.2    | Insulin receptor                                  | <i>INSR</i>   | 19p13.2  | lasso       | <u>0.09</u> | 7  | 0  | 7  | 0.09 | 0.12 | -7.53 | $4.98 \times 10^{-14}$ | $7.40 \times 10^{-12}$ |

\* SNPs within 1MB of the protein-encoding gene

a Associations between genetically predicted protein levels and PDAC risk after adjustment for age, sex, and top 10 principle components.

b FDR  $P$ -value: false discovery rate (FDR) adjusted  $P$ -value; associations with a FDR  $p \leq 0.05$  considered statistically significant

**Table 3.** Drug repurposing opportunities

| Protein             | Protein full name                               | Protein-encoding gene | OpenTargets information (overall score) | Drugbank ID | Drug name     | Molecular action     | Molecular docking score* |
|---------------------|-------------------------------------------------|-----------------------|-----------------------------------------|-------------|---------------|----------------------|--------------------------|
| sTie-1              | Tyrosine-Protein Kinase Receptor Tie-1, Soluble | <i>TIE1</i>           | 0.006                                   | DB12010     | Fostamatinib  | inhibitor            | -6.1                     |
| Carboxypeptidase B1 | Carboxypeptidase B                              | <i>CPB1</i>           | 0.159                                   | DB04272     | Citric acid   | NA                   | -3.9                     |
| Chymotrypsin        | Chymotrypsinogen B                              | <i>CTRB1</i>          | 0.078                                   | DB06692     | Aprotinin     | NA                   | MDNA                     |
| sE-Selectin         | E-selectin                                      | <i>SELE</i>           | 0.023                                   | DB01136     | Carvedilol    | inhibitor            | -6.9                     |
| P-Selectin          | P-Selectin                                      | <i>SELP</i>           | 0.008                                   | DB01109     | Heparin       | inhibitor            | -4.9                     |
|                     |                                                 |                       |                                         | DB08813     | Nadroparin    | inhibitor            | -4.9                     |
|                     |                                                 |                       |                                         | DB06779     | Dalteparin    | inhibitor            | -4.9                     |
|                     |                                                 |                       |                                         | DB15271     | Crizanlizumab | inhibitor            | 3DSNA                    |
| VEGF sR2            | Vascular endothelial growth factor receptor 2   | <i>KDR</i>            | 0.367                                   | DB06589     | Pazopanib     | inhibitor            | -6.3                     |
|                     |                                                 |                       |                                         | DB08896     | Regorafenib   | inhibitor            | -6.5                     |
|                     |                                                 |                       |                                         | DB09079     | Nintedanib    | inhibitor            | -5.8                     |
|                     |                                                 |                       |                                         | DB14840     | Ripretinib    | inhibitor            | -6.6                     |
|                     |                                                 |                       |                                         | DB00398     | Sorafenib     | antagonist           | -6.6                     |
|                     |                                                 |                       |                                         | DB01268     | Sunitinib     | inhibitor            | -5.6                     |
|                     |                                                 |                       |                                         | DB06595     | Midostaurin   | antagonist inhibitor | -5.1                     |
|                     |                                                 |                       |                                         | DB06626     | Axitinib      | inhibitor            | -6.0                     |
|                     |                                                 |                       |                                         | DB08875     | Cabozantinib  | antagonist           | <b>-7.0</b>              |
|                     |                                                 |                       |                                         | DB08901     | Ponatinib     | inhibitor            | -6.9                     |
| DB09078             | Lenvatinib                                      | inhibitor             | -6.1                                    |             |               |                      |                          |

|          |                                       |              |       |         |                   |                     |             |
|----------|---------------------------------------|--------------|-------|---------|-------------------|---------------------|-------------|
|          |                                       |              |       | DB05578 | Ramucirumab       | antagonist          | 3DSNA       |
|          |                                       |              |       | DB12010 | Fostamatinib      | inhibitor           | -5.3        |
|          |                                       |              |       | DB12147 | Erdafitinib       | substrate           | -5.5        |
|          |                                       |              |       | DB15822 | Pralsetinib       | inhibitor           | -6.9        |
|          |                                       |              |       | DB11800 | Tivozanib         | inhibitor           | -6.4        |
| ADH1B    | Alcohol dehydrogenase 1B              | <i>ADH1B</i> | 0.001 | DB00898 | Ethanol           | substrate           | -2.8        |
|          |                                       |              |       | DB09462 | Glycerin          | NA                  | -3.7        |
|          |                                       |              |       | DB00157 | NADH              | substrate           | <b>-9.6</b> |
|          |                                       |              |       | DB01213 | Fomepizole        | inhibitor           | -3.9        |
| Met      | Hepatocyte growth factor receptor     | <i>MET</i>   | 0.304 | DB08865 | Crizotinib        | inhibitor           | <b>-8.1</b> |
|          |                                       |              |       | DB08875 | Cabozantinib      | antagonist          | <b>-8</b>   |
|          |                                       |              |       | DB12267 | Brigatinib        | inhibitor           | <b>-8.2</b> |
|          |                                       |              |       | DB12010 | Fostamatinib      | inhibitor           | -6.7        |
|          |                                       |              |       | DB11791 | Capmatinib        | inhibitor           | <b>-8.7</b> |
|          |                                       |              |       | DB15133 | Tepotinib         | inhibitor           | <b>-8.3</b> |
|          |                                       |              |       | DB11800 | Tivozanib         | inhibitor           | <b>-8.2</b> |
|          |                                       |              |       | DB16695 | Amivantamab       | antagonist antibody | 3DSNA       |
| IGF-I sR | Insulin-like growth factor 1 receptor | <i>IGF1R</i> | 0.099 | DB00071 | Insulin pork      | NA                  | MDNA        |
|          |                                       |              |       | DB00046 | Insulin lispro    | activator           | MDNA        |
|          |                                       |              |       | DB01307 | Insulin detemir   | activator           | MDNA        |
|          |                                       |              |       | DB00047 | Insulin glargine  | activator           | MDNA        |
|          |                                       |              |       | DB01306 | Insulin aspart    | activator           | MDNA        |
|          |                                       |              |       | DB01309 | Insulin glulisine | activator           | MDNA        |
|          |                                       |              |       | DB09564 | Insulin degludec  | activator           | MDNA        |

|    |                  |             |       |         |                      |                  |             |
|----|------------------|-------------|-------|---------|----------------------|------------------|-------------|
|    |                  |             |       | DB14751 | Mecasermin rinfabate | agonist          | MDNA        |
|    |                  |             |       | DB09456 | Insulin beef         | activator        | MDNA        |
|    |                  |             |       | DB08804 | Nandrolone decanoate | inducer          | -5.8        |
|    |                  |             |       | DB01277 | Mecasermin           | agonist          | 3DSNA       |
|    |                  |             |       | DB00030 | Insulin human        | activator        | MDNA        |
|    |                  |             |       | DB06343 | Teprotumumab         | binder, antibody | 3DSNA       |
|    |                  |             |       | DB12267 | Brigatinib           | inhibitor        | -5.7        |
|    |                  |             |       | DB00047 | Insulin glargine     | agonist          | MDNA        |
|    |                  |             |       | DB00071 | Insulin pork         | binder           | MDNA        |
|    |                  |             |       | DB01307 | Insulin detemir      | agonist          | MDNA        |
|    |                  |             |       | DB00046 | Insulin lispro       | agonist          | MDNA        |
|    |                  |             |       | DB01306 | Insulin aspart       | agonist          | MDNA        |
|    |                  |             |       | DB01309 | Insulin glulisine    | agonist          | MDNA        |
|    |                  |             |       | DB09564 | Insulin degludec     | agonist          | MDNA        |
|    |                  |             |       | DB09129 | Chromic chloride     | activator        | MDNA        |
|    |                  |             |       | DB14751 | Mecasermin rinfabate | NA               | MDNA        |
|    |                  |             |       | DB09456 | Insulin beef         | agonist          | MDNA        |
|    |                  |             |       | DB00030 | Insulin human        | agonist          | MDNA        |
|    |                  |             |       | DB01277 | Mecasermin           | NA               | 3DSNA       |
|    |                  |             |       | DB12267 | Brigatinib           | binding          | <b>-8.4</b> |
| IR | Insulin receptor | <i>INSR</i> | 0.013 | DB12010 | Fostamatinib         | inhibitor        | <b>-7.5</b> |

\* a score of  $\leq -7$  represents a good interaction between the protein and corresponding drug agent and is bolded.

MDNA: Molecular docking not applicable

3DSNA: 3D structure not available.

### ① Establish protein prediction models

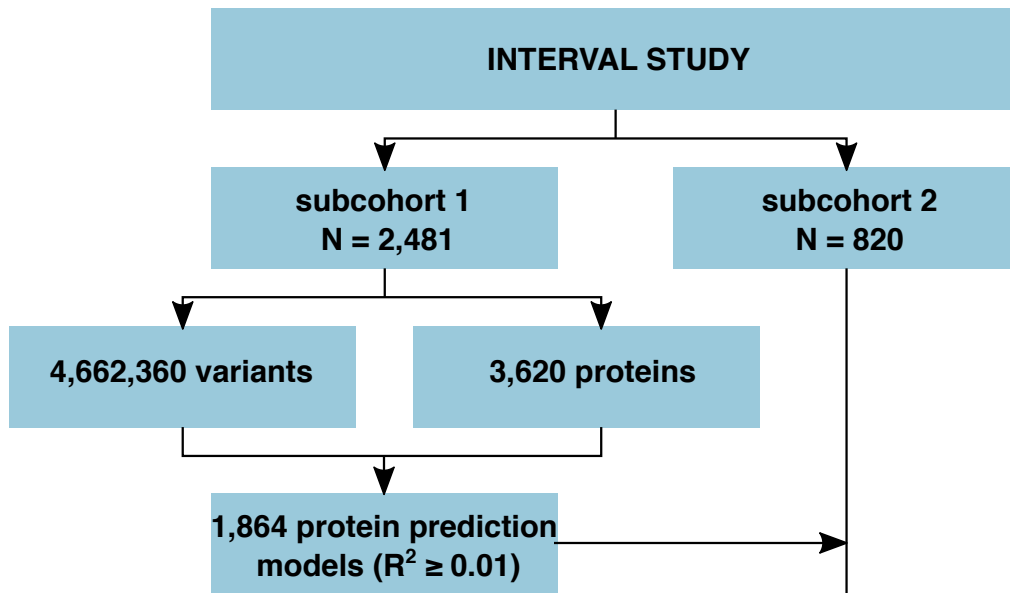

### ② Proteome-wide association study (PWAS)

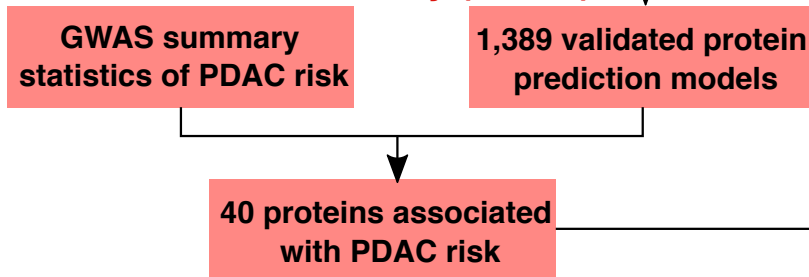

### ③ Downstream analysis

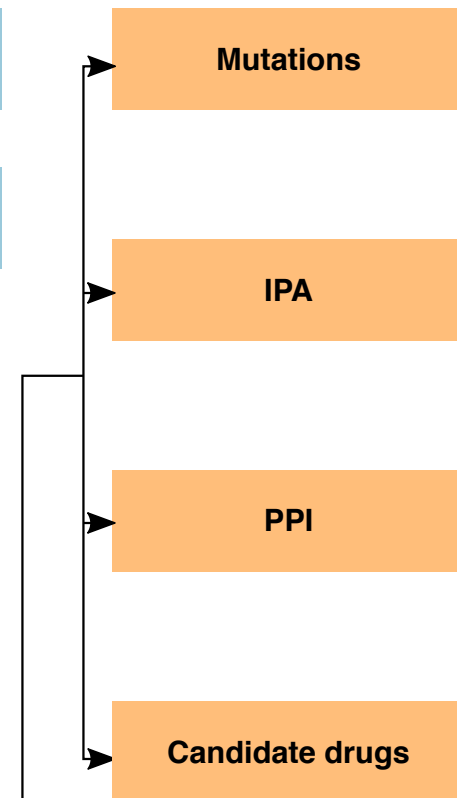

Figure 2

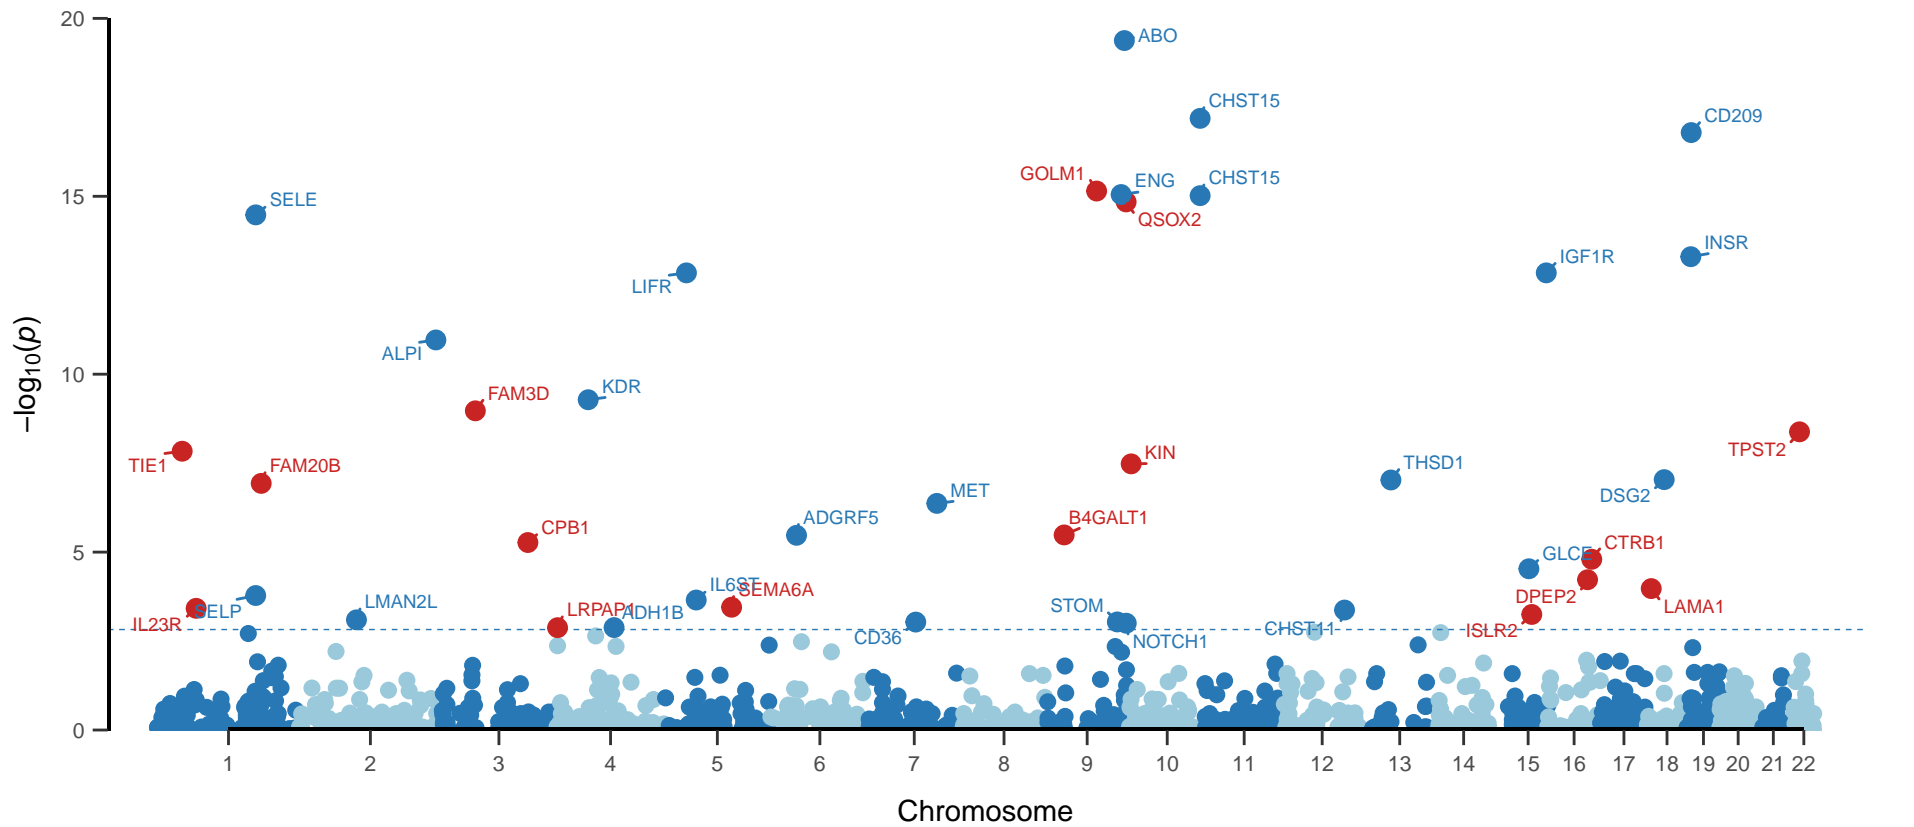

Figure 3

[Click here to access/download;Figure 3.pdf](#)

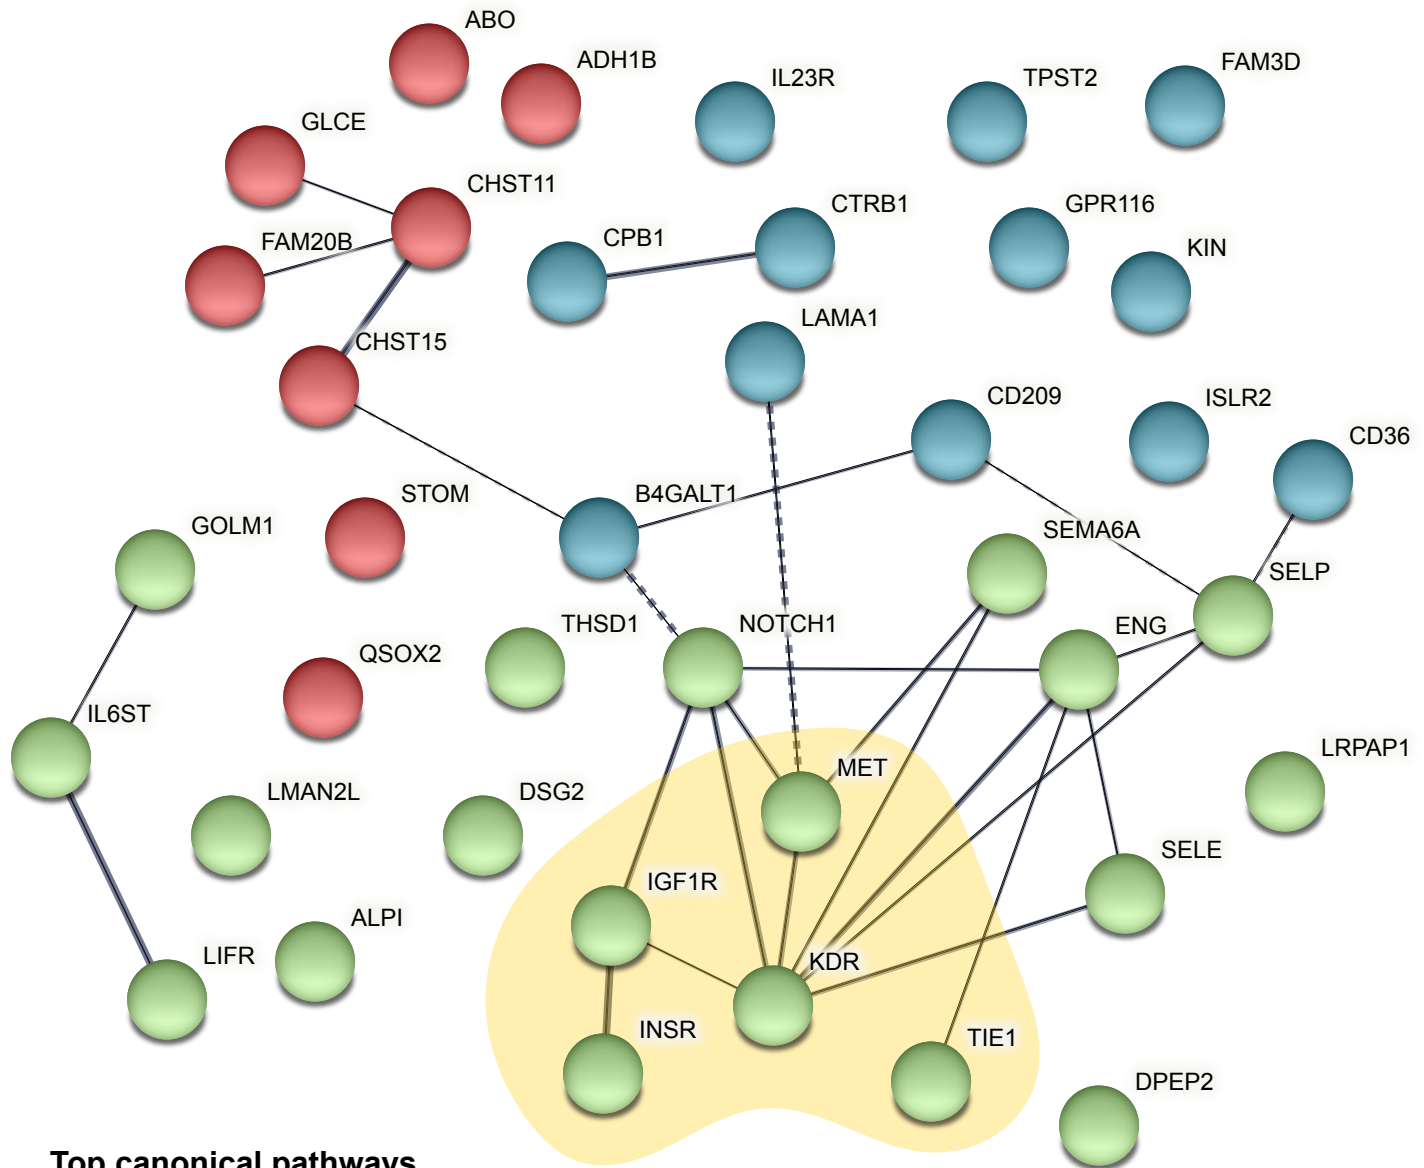



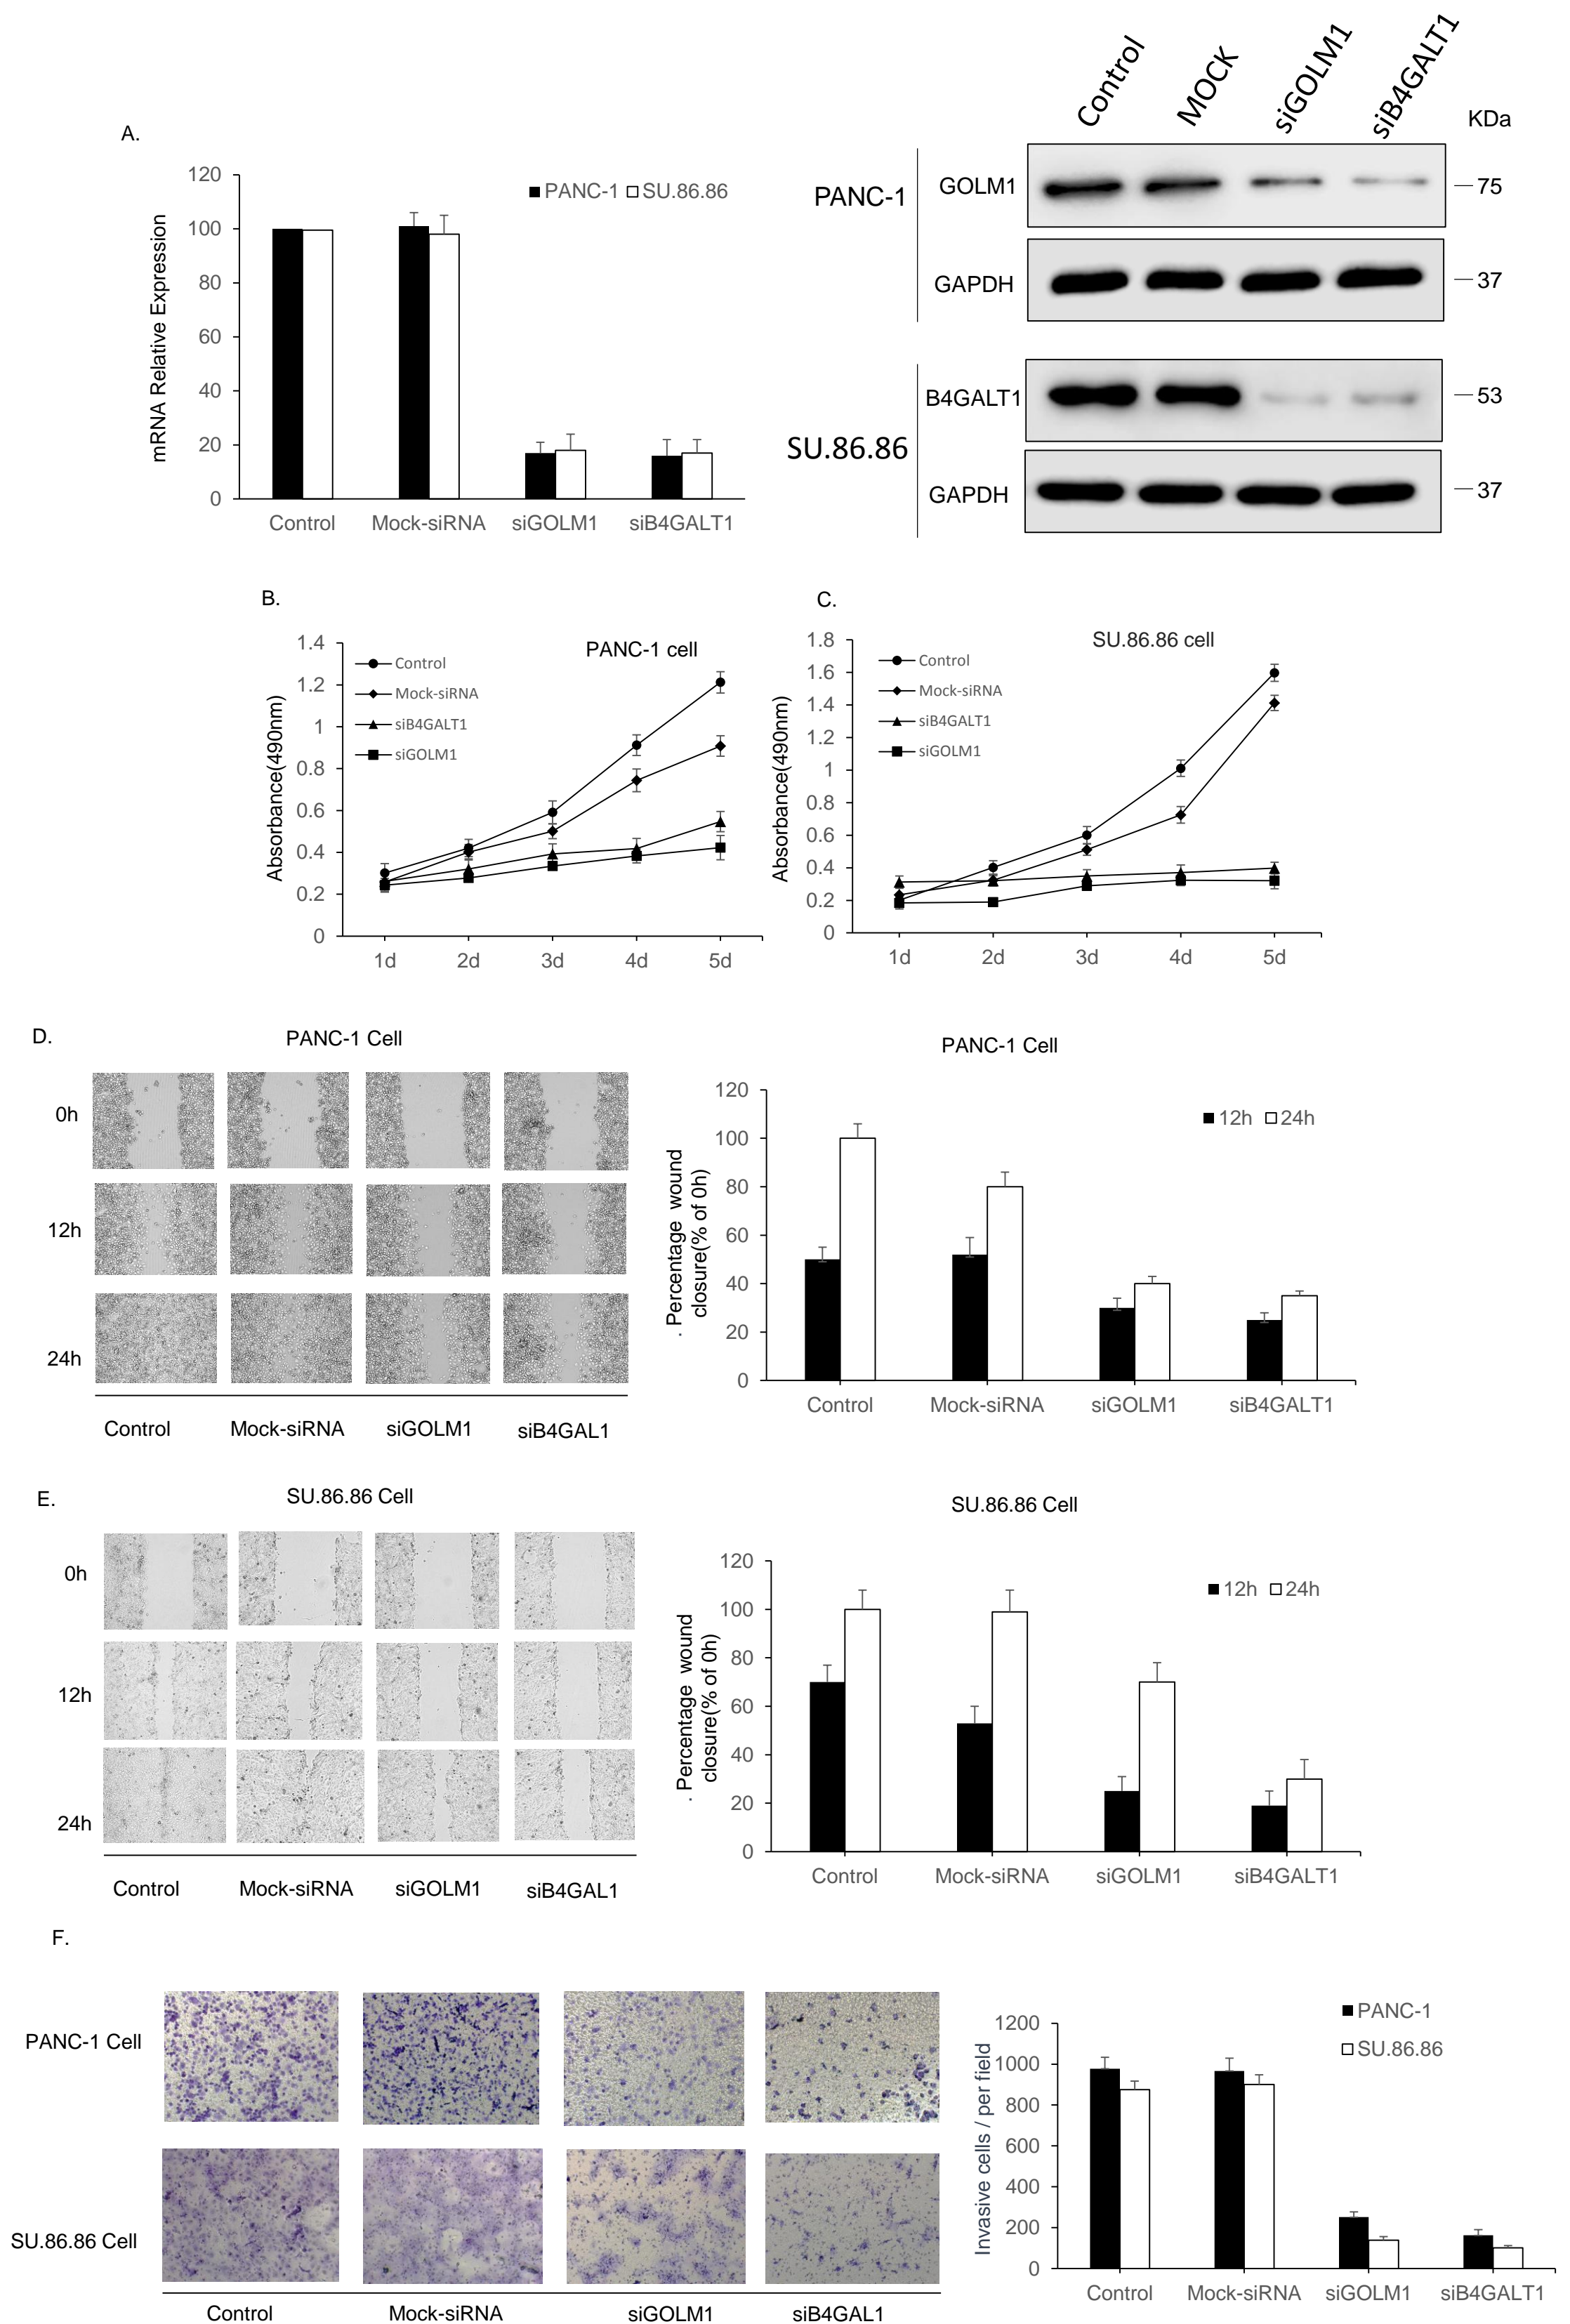

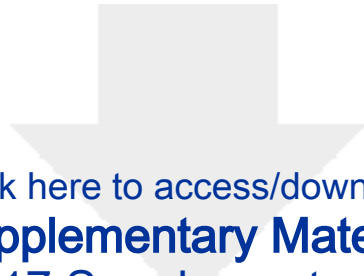

Click here to access/download  
**Supplementary Material**  
2024-Jan-17 Supplementary File.docx

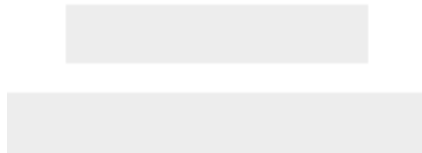

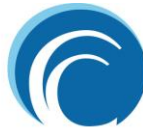

UNIVERSITY OF HAWAI'I  
**CANCER CENTER**

January 17, 2024

Dr. Scott Edmunds

Editor-in-Chief, *GigaScience*

**Proteome-wide association study and functional validation identify novel protein markers for pancreatic ductal adenocarcinoma**

Dear Dr. Edmunds:

Thank you very much for your email sharing with us the reviewers' comments for our earlier submitted manuscript (GIGA-D-23-00321). We are excited to hear that all reviewers think that our work is interesting, unique, and original. We are glad to learn that all reviewers' comments are addressable. We have now carefully addressed all raised concerns and substantially improved our paper. We prepared the point-by-point responses to the reviewer's comments, and tracked changes in the revised manuscript.

We hope that we have satisfactorily addressed all of the reviewers' comments and made this manuscript acceptable for publication in *GigaScience*.

We look forward to hearing from you regarding the decision of *GigaScience* about this manuscript.

Sincerely,

Lang Wu, Ph.D.

Associate Professor

Cancer Epidemiology Division, Population Sciences in the Pacific Program

University of Hawaii Cancer Center, University of Hawaii at Manoa

Email: [lwu@cc.hawaii.edu](mailto:lwu@cc.hawaii.edu)

701 Ilalo Street, Honolulu HI 96813 | Tel (808) 586-2985 | Fax (808) 586-2982 | [www.uhcancercenter.org](http://www.uhcancercenter.org)

A National Cancer Center Institute-designated Cancer Center

*An Equal Opportunity/Affirmative Action Institution.*
